# Supplementary material for: Protection From Natural Immunity Against Enteric Infections and Etiology-Specific Diarrhea in a Longitudinal Birth Cohort
Source: PubMed Central journal article supplement (PMC7653087; doi:10.1093/infdis/jiaa031), 2020-01-27
Supplement: jiaa031_suppl_supplementary_material.pdf [file jiaa031_suppl_supplementary_material.pdf]

## Supplementary material

### Protection from natural immunity against enteric infections and etiology-specific diarrhea in a longitudinal birth cohort

Elizabeth T. Rogawski McQuade<sup>1,2</sup>, Jie Liu<sup>2</sup>, Gagandeep Kang<sup>3</sup>, Margaret N. Kosek<sup>2,4</sup>, Aldo A.M. Lima<sup>5</sup>, Pascal O. Bessong<sup>6</sup>, Amidou Samie<sup>6</sup>, Rashidul Haque<sup>7</sup>, Estomih R. Mduma<sup>8</sup>, Sanjaya Shrestha<sup>9</sup>, Jose Paulo Leite<sup>10</sup>, Ladaporn Bodhidatta<sup>11</sup>, Najeeha Iqbal<sup>12</sup>, Nicola Page<sup>13</sup>, Ireen Kiwelu<sup>14</sup>, Zulfiqar Bhutta<sup>12</sup>, Tahmeed Ahmed<sup>7</sup>, Eric R. Houpt<sup>2</sup>, James A. Platts-Mills<sup>2</sup>

<sup>1</sup>Department of Public Health Sciences, University of Virginia, Charlottesville, VA, USA

<sup>2</sup>Division of Infectious Diseases & International Health, University of Virginia, Charlottesville, VA, USA

<sup>3</sup>Christian Medical College, Vellore, India

<sup>4</sup>Asociación Benéfica PRISMA, Iquitos, Peru

<sup>5</sup>Federal University of Ceara, Fortaleza, Brazil

<sup>6</sup>University of Venda, Thohoyandou, South Africa

<sup>7</sup>International Centre for Diarrhoeal Disease Research, Bangladesh, Dhaka, Bangladesh

<sup>8</sup>Haydom Global Health Research Centre, Haydom, Tanzania

<sup>9</sup>Walter Reed/AFRIMS Research Unit, Nepal, Kathmandu, Nepal

<sup>10</sup>Fundação Oswaldo Cruz (Fiocruz), Rio de Janeiro, Brazil

<sup>11</sup>Armed Forces Research Institute of Medical Sciences (AFRIMS), Bangkok, Thailand

<sup>12</sup>Aga Khan University, Karachi, Pakistan

<sup>13</sup>National Institute for Communicable Diseases, Johannesburg, South Africa

<sup>14</sup>Kilimanjaro Clinical Research Institute, Moshi, Tanzania

**Table S1.** Real time PCR assays on the TaqMan Array Card used in MAL-ED.

All the assays have been described previously and extensively validated.<sup>1-3</sup> Nucleic acid was extracted with the QIAamp Fast DNA Stool mini kit (Qiagen, Hilden, Germany) with pre-treatment steps that included bead beating. AgPath One Step RT-PCR reagents were used for qPCR reactions, which were performed on ViiA 7 systems. Quantification cycles (Cqs) are the PCR cycle values at which fluorescence from amplification exceeds the background, which acts as an inverse metric of quantity of nucleic acid. Valid results required proper functioning of controls (the negative results of a sample are valid only when its external control MS2 is positive,  $Cq \leq 35$ ; the positive results are valid only when the corresponding extraction blank is negative for the relevant targets,  $Cq > 35$ ), and excluded data flagged by the real time PCR software, i.e. BADROX in combination with NOISE or SPIKE.

|                                     | Pathogen                         | Gene                                    |
|-------------------------------------|----------------------------------|-----------------------------------------|
| Viruses                             | Adenovirus 40/41                 | Fiber gene                              |
|                                     | Astrovirus                       | Capsid                                  |
|                                     | Norovirus GI/GII                 | GI ORF1-2 and GII ORF1-2                |
|                                     | Rotavirus                        | <i>NSP3</i>                             |
|                                     | Sapovirus                        | <i>RdRp</i>                             |
| Bacteria                            | EAEC*                            | <i>aaiC</i> , <i>aatA</i> , <i>aggR</i> |
|                                     | Atypical EPEC*                   | <i>eae</i>                              |
|                                     | Typical EPEC*                    | <i>bfpA</i>                             |
|                                     | ETEC*                            | <i>LT</i> , <i>STh</i> and <i>STp</i>   |
|                                     | STEC*                            | <i>stx1</i> , <i>stx2</i>               |
|                                     | <i>Aeromonas</i>                 | Aerolysin                               |
|                                     | <i>Campylobacter spp.</i>        | <i>cadF</i> and <i>cpn60</i>            |
|                                     | <i>Helicobacter pylori</i>       | <i>ureC</i>                             |
|                                     | <i>Plesiomonas shigelloides</i>  | <i>gyrB</i>                             |
|                                     | <i>Salmonella</i>                | <i>ttr</i>                              |
|                                     | <i>Shigella/EIEC†</i>            | <i>ipaH</i>                             |
|                                     | <i>Vibrio cholerae</i>           | <i>hlyA</i>                             |
|                                     | Fungi                            | <i>Enterocytozoon bieneusi</i>          |
| <i>Encephalitozoon intestinalis</i> |                                  | SSU rRNA                                |
| Protozoa                            | <i>Cryptosporidium</i>           | 18S rRNA                                |
|                                     | <i>Cyclospora cayetanensis</i>   | 18S rRNA                                |
|                                     | <i>Cystoisospora belli</i>       | 18S rRNA                                |
|                                     | <i>Entamoeba histolytica</i>     | 18S rRNA                                |
|                                     | <i>Giardia</i>                   | 18S rRNA                                |
| Helminth                            | <i>Ancylostoma duodenale</i>     | <i>ITS2</i>                             |
|                                     | <i>Ascaris lumbricoides</i>      | <i>ITS1</i>                             |
|                                     | <i>Necator americanus</i>        | <i>ITS2</i>                             |
|                                     | <i>Strongyloides stercoralis</i> | Dispersed repetitive sequence           |
|                                     | <i>Trichuris trichiura</i>       | 18S rRNA                                |
| Controls                            | MS2                              | <i>MS2g1</i>                            |
|                                     | PhHV                             | <i>gB</i>                               |

\**E. coli* pathotypes were defined as follows: EAEC (*aaiC*, or *aatA*, or both), atypical EPEC (*eae* without *bfpA*, *stx1*, and *stx2*), typical EPEC (*bfpA*), ETEC (*STh*, *STp*, or *LT*), STEC (*eae* without *bfpA* and with *stx1*, *stx2*, or both).

†Both *Shigella* and enteroinvasive *E. coli* are detected using the *ipaH* target, however based on previous findings that *S. flexneri* and *S. sonnei* account for the majority of *ipaH* detections,<sup>2</sup> plus the finding that *Shigella* culture positive stools are metagenomically similar to *ipaH* positive stools,<sup>4</sup> for simplicity we interpret *ipaH* detections as diagnostic of *Shigella*.

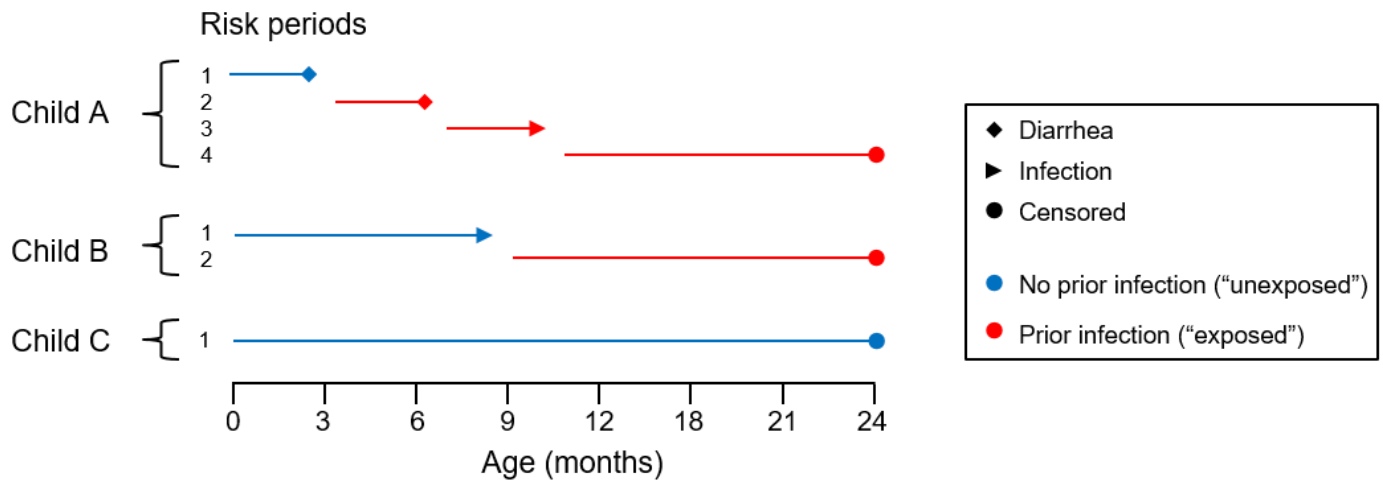

**Figure S1.** Conceptual diagram of the risk period formulation for example children A, B, and C in the Andersen and Gill extension of the Cox model. Each risk period is defined by birth or age at 21 days after a prior infection to age at subsequent outcome, and each child contributed multiple risk periods from birth to 2 years of age. This diagram was adapted from Kelly PJ and Lim LLY, 2000.<sup>5</sup>

**Table S2.** Estimates of protection against infection and attributable diarrhea due to one or two or more prior infections from the same pathogen in the MAL-ED cohort.

| Pathogen                         | # previous infections | N    | Infection outcome               |                         |                       | Attributable diarrhea outcome |                                |                         |                       |                         |
|----------------------------------|-----------------------|------|---------------------------------|-------------------------|-----------------------|-------------------------------|--------------------------------|-------------------------|-----------------------|-------------------------|
|                                  |                       |      | N (%) with subsequent infection | Unadjusted* HR (95% CI) | Adjusted† HR (95% CI) | Calibrated‡ HR (95% CI)       | N (%) with subsequent diarrhea | Unadjusted* HR (95% CI) | Adjusted† HR (95% CI) | Calibrated‡ HR (95% CI) |
| Rotavirus                        | 0                     | 1715 | 839 (48.9)                      | 1.                      | 1.                    | 1.                            | 375 (21.9)                     | 1.                      | 1.                    | 1.                      |
|                                  | 1                     | 839  | 271 (32.3)                      | 0.79 (0.68, 0.93)       | 0.79 (0.68, 0.93)     | 0.74 (0.61, 0.91)             | 127 (15.1)                     | 0.62 (0.50, 0.78)       | 0.63 (0.50, 0.78)     | 0.53 (0.42, 0.66)       |
|                                  | 2+                    | 271  | 75 (27.7)                       | 0.81 (0.61, 1.07)       | 0.81 (0.61, 1.07)     | 0.73 (0.55, 0.97)             | 42 (15.5)                      | 0.56 (0.41, 0.78)       | 0.56 (0.40, 0.78)     | 0.43 (0.31, 0.61)       |
| Astrovirus                       | 0                     | 1715 | 1048 (61.1)                     | 1.                      | 1.                    | 1.                            | 177 (10.3)                     | 1.                      | 1.                    | 1.                      |
|                                  | 1                     | 1048 | 482 (46.0)                      | 0.83 (0.74, 0.93)       | 0.82 (0.73, 0.92)     | 0.78 (0.65, 0.94)             | 85 (8.1)                       | 0.75 (0.57, 0.98)       | 0.75 (0.57, 0.98)     | 0.66 (0.49, 0.87)       |
|                                  | 2+                    | 482  | 173 (35.9)                      | 0.75 (0.63, 0.88)       | 0.74 (0.62, 0.87)     | 0.72 (0.60, 0.88)             | 39 (8.1)                       | 0.65 (0.44, 0.94)       | 0.64 (0.43, 0.94)     | 0.52 (0.35, 0.77)       |
| Norovirus GII                    | 0                     | 1715 | 1310 (76.4)                     | 1.                      | 1.                    | 1.                            | 140 (8.2)                      | 1.                      | 1.                    | 1.                      |
|                                  | 1                     | 1310 | 799 (61.0)                      | 0.98 (0.88, 1.08)       | 0.96 (0.87, 1.07)     | 0.96 (0.86, 1.07)             | 91 (6.9)                       | 0.76 (0.57, 1.02)       | 0.77 (0.57, 1.02)     | 0.73 (0.52, 1.03)       |
|                                  | 2+                    | 799  | 386 (48.3)                      | 0.87 (0.77, 0.98)       | 0.84 (0.74, 0.95)     | 0.88 (0.78, 1.01)             | 60 (7.5)                       | 0.57 (0.41, 0.80)       | 0.57 (0.41, 0.80)     | 0.56 (0.40, 0.79)       |
| Sapovirus                        | 0                     | 1715 | 1350 (78.7)                     | 1.                      | 1.                    | 1.                            | 229 (13.4)                     | 1.                      | 1.                    | 1.                      |
|                                  | 1                     | 1350 | 833 (61.7)                      | 0.95 (0.87, 1.05)       | 0.93 (0.85, 1.03)     | 0.92 (0.82, 1.03)             | 158 (11.7)                     | 0.94 (0.76, 1.16)       | 0.92 (0.75, 1.14)     | 0.82 (0.66, 1.02)       |
|                                  | 2+                    | 833  | 405 (48.6)                      | 0.85 (0.76, 0.96)       | 0.83 (0.74, 0.94)     | 0.78 (0.69, 0.88)             | 120 (14.4)                     | 1.06 (0.82, 1.35)       | 1.03 (0.80, 1.32)     | 0.84 (0.65, 1.09)       |
| Adenovirus 40/41                 | 0                     | 1715 | 1161 (67.7)                     | 1.                      | 1.                    | 1.                            | 166 (9.7)                      | 1.                      | 1.                    | 1.                      |
|                                  | 1                     | 1161 | 591 (50.9)                      | 0.97 (0.87, 1.09)       | 0.96 (0.86, 1.07)     | 0.89 (0.78, 1.01)             | 109 (9.4)                      | 1.06 (0.82, 1.39)       | 1.03 (0.78, 1.34)     | 0.87 (0.65, 1.16)       |
|                                  | 2+                    | 591  | 286 (48.4)                      | 1.04 (0.90, 1.22)       | 1.02 (0.87, 1.19)     | 0.95 (0.81, 1.13)             | 92 (15.6)                      | 1.13 (0.83, 1.53)       | 1.07 (0.78, 1.46)     | 0.82 (0.59, 1.14)       |
| <i>Shigella</i>                  | 0                     | 1715 | 1141 (66.5)                     | 1.                      | 1.                    | 1.                            | 391 (22.8)                     | 1.                      | 1.                    | 1.                      |
|                                  | 1                     | 1141 | 719 (63.0)                      | 1.72 (1.54, 1.93)       | 1.69 (1.51, 1.90)     | 1.46 (1.21, 1.77)             | 171 (15.0)                     | 1.09 (0.90, 1.33)       | 1.07 (0.87, 1.30)     | 0.85 (0.69, 1.04)       |
|                                  | 2+                    | 719  | 405 (56.3)                      | 1.76 (1.57, 1.97)       | 1.70 (1.52, 1.91)     | 1.37 (0.95, 1.96)             | 126 (17.5)                     | 1.00 (0.80, 1.24)       | 0.95 (0.76, 1.19)     | 0.67 (0.53, 0.84)       |
| ST-EPEC                          | 0                     | 1715 | 1244 (72.5)                     | 1.                      | 1.                    | 1.                            | 137 (8.0)                      | 1.                      | 1.                    | 1.                      |
|                                  | 1                     | 1244 | 825 (66.3)                      | 1.06 (0.96, 1.16)       | 1.05 (0.95, 1.16)     | 1.02 (0.92, 1.13)             | 144 (11.6)                     | 1.45 (1.14, 1.85)       | 1.45 (1.13, 1.85)     | 1.25 (0.96, 1.63)       |
|                                  | 2+                    | 825  | 513 (62.2)                      | 1.06 (0.95, 1.18)       | 1.04 (0.94, 1.16)     | 1.00 (0.90, 1.13)             | 116 (14.1)                     | 1.13 (0.85, 1.51)       | 1.10 (0.82, 1.46)     | 0.84 (0.62, 1.13)       |
| tEPEC                            | 0                     | 1715 | 1251 (72.9)                     | 1.                      | 1.                    | 1.                            | 23 (1.3)                       | 1.                      | 1.                    | 1.                      |
|                                  | 1                     | 1251 | 835 (66.7)                      | 1.22 (1.10, 1.36)       | 1.21 (1.08, 1.34)     | 1.15 (0.94, 1.40)             | 6 (0.5)                        | 1.01 (0.35, 2.95)       | 0.99 (0.35, 2.80)     | 0.60 (0.21, 1.75)       |
|                                  | 2+                    | 835  | 452 (54.1)                      | 0.99 (0.88, 1.10)       | 0.96 (0.85, 1.07)     | 0.86 (0.66, 1.13)             | 2 (0.2)                        | 0.59 (0.12, 2.96)       | 0.52 (0.11, 2.50)     | 0.46 (0.09, 2.48)       |
| <i>Campylobacter jejuni/coli</i> | 0                     | 1715 | 1191 (69.4)                     | 1.                      | 1.                    | 1.                            | 73 (4.3)                       | 1.                      | 1.                    | 1.                      |
|                                  | 1                     | 1191 | 850 (71.4)                      | 1.38 (1.24, 1.53)       | 1.35 (1.21, 1.50)     | 1.35 (1.20, 1.51)             | 37 (3.1)                       | 1.30 (0.83, 2.04)       | 1.29 (0.82, 2.03)     | 1.34 (0.82, 2.16)       |
|                                  | 2+                    | 850  | 569 (66.9)                      | 1.79 (1.61, 2.00)       | 1.71 (1.53, 1.91)     | 1.63 (1.45, 1.84)             | 40 (4.7)                       | 1.54 (0.95, 2.49)       | 1.42 (0.87, 2.30)     | 1.43 (0.88, 2.34)       |
| <i>Cryptosporidium</i>           | 0                     | 1715 | 950 (55.4)                      | 1.                      | 1.                    | 1.                            | 86 (5.0)                       | 1.                      | 1.                    | 1.                      |
|                                  | 1                     | 950  | 347 (36.5)                      | 0.93 (0.80, 1.07)       | 0.90 (0.78, 1.04)     | 0.81 (0.65, 1.02)             | 17 (1.8)                       | 0.44 (0.26, 0.72)       | 0.42 (0.26, 0.70)     | 0.35 (0.21, 0.59)       |
|                                  | 2+                    | 347  | 111 (32.0)                      | 0.88 (0.71, 1.07)       | 0.83 (0.68, 1.02)     | 0.71 (0.49, 1.03)             | 8 (2.3)                        | 0.34 (0.16, 0.73)       | 0.32 (0.15, 0.70)     | 0.25 (0.11, 0.53)       |

\*Hazard ratio adjusted for site

†Hazard ratio adjusted for site, SES, sex, enrollment WAZ, maternal education, maternal height, crowding, and exclusive breastfeeding in first 6 months; also shown in Figure 1A

‡Hazard ratio adjusted for the same variables above and calibrated based on negative control estimates; also shown in Figure 1B

**Table S3.** Estimates of protection against infection and attributable diarrhea due to one or more prior infections from the same pathogen in the MAL-ED cohort.

| Pathogen                         | # previous infections | N    | Infection outcome               |                         |                       | Attributable diarrhea outcome |                                |                         |                       |                         |
|----------------------------------|-----------------------|------|---------------------------------|-------------------------|-----------------------|-------------------------------|--------------------------------|-------------------------|-----------------------|-------------------------|
|                                  |                       |      | N (%) with subsequent infection | Unadjusted* HR (95% CI) | Adjusted† HR (95% CI) | Calibrated‡ HR (95% CI)       | N (%) with subsequent diarrhea | Unadjusted* HR (95% CI) | Adjusted† HR (95% CI) | Calibrated‡ HR (95% CI) |
| Rotavirus                        | 0                     | 1715 | 839 (48.9)                      | 1.                      | 1.                    | 1.                            | 375 (21.9)                     | 1.                      | 1.                    | 1.                      |
|                                  | 1+                    | 839  | 271 (32.3)                      | 0.80 (0.68, 0.93)       | 0.80 (0.68, 0.93)     | 0.74 (0.61, 0.89)             | 147 (17.5)                     | 0.61 (0.50, 0.75)       | 0.61 (0.50, 0.75)     | 0.50 (0.41, 0.62)       |
| Astrovirus                       | 0                     | 1715 | 1048 (61.1)                     | 1.                      | 1.                    | 1.                            | 177 (10.3)                     | 1.                      | 1.                    | 1.                      |
|                                  | 1+                    | 1048 | 482 (46.0)                      | 0.81 (0.72, 0.90)       | 0.80 (0.71, 0.89)     | 0.77 (0.64, 0.92)             | 115 (11.0)                     | 0.72 (0.56, 0.93)       | 0.72 (0.55, 0.93)     | 0.62 (0.48, 0.81)       |
| Norovirus GII                    | 0                     | 1715 | 1310 (76.4)                     | 1.                      | 1.                    | 1.                            | 140 (8.2)                      | 1.                      | 1.                    | 1.                      |
|                                  | 1+                    | 1310 | 799 (61.0)                      | 0.94 (0.86, 1.03)       | 0.92 (0.84, 1.01)     | 0.93 (0.84, 1.02)             | 138 (10.5)                     | 0.69 (0.53, 0.91)       | 0.70 (0.53, 0.91)     | 0.67 (0.49, 0.91)       |
| Sapovirus                        | 0                     | 1715 | 1350 (78.7)                     | 1.                      | 1.                    | 1.                            | 229 (13.4)                     | 1.                      | 1.                    | 1.                      |
|                                  | 1+                    | 1350 | 833 (61.7)                      | 0.92 (0.84, 1.01)       | 0.90 (0.82, 0.98)     | 0.87 (0.79, 0.97)             | 237 (17.6)                     | 0.98 (0.81, 1.19)       | 0.96 (0.79, 1.16)     | 0.84 (0.69, 1.03)       |
| Adenovirus 40/41                 | 0                     | 1715 | 1161 (67.7)                     | 1.                      | 1.                    | 1.                            | 166 (9.7)                      | 1.                      | 1.                    | 1.                      |
|                                  | 1+                    | 1161 | 591 (50.9)                      | 1.00 (0.89, 1.11)       | 0.98 (0.88, 1.09)     | 0.91 (0.80, 1.03)             | 154 (13.3)                     | 1.09 (0.85, 1.40)       | 1.04 (0.81, 1.34)     | 0.86 (0.66, 1.13)       |
| <i>Shigella</i>                  | 0                     | 1715 | 1141 (66.5)                     | 1.                      | 1.                    | 1.                            | 391 (22.8)                     | 1.                      | 1.                    | 1.                      |
|                                  | 1+                    | 1141 | 719 (63.0)                      | 1.74 (1.58, 1.92)       | 1.70 (1.54, 1.87)     | 1.42 (1.07, 1.88)             | 250 (21.9)                     | 1.05 (0.89, 1.25)       | 1.02 (0.85, 1.21)     | 0.79 (0.65, 0.95)       |
| ST-EPEC                          | 0                     | 1715 | 1244 (72.5)                     | 1.                      | 1.                    | 1.                            | 137 (8.0)                      | 1.                      | 1.                    | 1.                      |
|                                  | 1+                    | 1244 | 825 (66.3)                      | 1.06 (0.97, 1.16)       | 1.05 (0.96, 1.15)     | 1.02 (0.93, 1.13)             | 234 (18.8)                     | 1.33 (1.06, 1.68)       | 1.31 (1.04, 1.66)     | 1.11 (0.85, 1.44)       |
| tEPEC                            | 0                     | 1715 | 1251 (72.9)                     | 1.                      | 1.                    | 1.                            | 23 (1.3)                       | 1.                      | 1.                    | 1.                      |
|                                  | 1+                    | 1251 | 835 (66.7)                      | 1.13 (1.03, 1.23)       | 1.10 (1.01, 1.21)     | 1.06 (0.88, 1.27)             | 8 (0.6)                        | 0.88 (0.31, 2.52)       | 0.84 (0.31, 2.29)     | 0.60 (0.22, 1.65)       |
| <i>Campylobacter jejuni/coli</i> | 0                     | 1715 | 1191 (69.4)                     | 1.                      | 1.                    | 1.                            | 73 (4.3)                       | 1.                      | 1.                    | 1.                      |
|                                  | 1+                    | 1191 | 850 (71.4)                      | 1.56 (1.42, 1.71)       | 1.50 (1.36, 1.65)     | 1.47 (1.33, 1.64)             | 68 (5.7)                       | 1.39 (0.93, 2.09)       | 1.34 (0.89, 2.02)     | 1.42 (0.93, 2.15)       |
| <i>Cryptosporidium</i>           | 0                     | 1715 | 950 (55.4)                      | 1.                      | 1.                    | 1.                            | 86 (5.0)                       | 1.                      | 1.                    | 1.                      |
|                                  | 1+                    | 950  | 347 (36.5)                      | 0.91 (0.80, 1.05)       | 0.88 (0.77, 1.01)     | 0.79 (0.61, 1.04)             | 24 (2.5)                       | 0.40 (0.25, 0.64)       | 0.39 (0.24, 0.62)     | 0.32 (0.20, 0.51)       |

\*Hazard ratio adjusted for site

†Hazard ratio adjusted for site, SES, sex, enrollment WAZ, maternal education, maternal height, crowding, and exclusive breastfeeding in first 6 months

‡Hazard ratio adjusted for the same variables above and calibrated based on negative control estimates

**Table S4.** Site-specific estimates of protection against infection and attributable diarrhea due to one or more prior infections from the same pathogen in the MAL-ED cohort.

| Pathogen      | Site                | Infection outcome  |                         |                                   |                                     | Attributable diarrhea outcome |                         |                                   |                                     |
|---------------|---------------------|--------------------|-------------------------|-----------------------------------|-------------------------------------|-------------------------------|-------------------------|-----------------------------------|-------------------------------------|
|               |                     | N total infections | Unadjusted* HR (95% CI) | Adjusted <sup>†</sup> HR (95% CI) | Calibrated <sup>‡</sup> HR (95% CI) | N total diarrhea episodes     | Unadjusted* HR (95% CI) | Adjusted <sup>†</sup> HR (95% CI) | Calibrated <sup>‡</sup> HR (95% CI) |
| Rotavirus     | Dhaka, Bangladesh   | 347                | 0.66 (0.53, 0.83)       | 0.67 (0.53, 0.83)                 | 0.62 (0.48, 0.79)                   | 216                           | 0.62 (0.46, 0.83)       | 0.62 (0.47, 0.83)                 | 0.52 (0.38, 0.69)                   |
|               | Fortaleza, Brazil   | 25                 | 0.99 (0.14, 6.96)       | 0.99 (0.14, 6.93)                 | 0.92 (0.13, 6.45)                   | 3                             | — <sup>§</sup>          | — <sup>§</sup>                    | — <sup>§</sup>                      |
|               | Vellore, India      | 187                | 1.05 (0.76, 1.46)       | 1.04 (0.74, 1.45)                 | 0.96 (0.68, 1.37)                   | 67                            | 0.83 (0.52, 1.34)       | 0.83 (0.51, 1.34)                 | 0.68 (0.42, 1.11)                   |
|               | Bhaktapur, Nepal    | 180                | 0.84 (0.61, 1.16)       | 0.84 (0.61, 1.16)                 | 0.78 (0.55, 1.10)                   | 97                            | 0.53 (0.32, 0.86)       | 0.52 (0.32, 0.85)                 | 0.43 (0.26, 0.71)                   |
|               | Loreto, Peru        | 130                | 0.75 (0.49, 1.17)       | 0.76 (0.49, 1.18)                 | 0.71 (0.45, 1.11)                   | 63                            | 0.80 (0.43, 1.50)       | 0.81 (0.43, 1.52)                 | 0.67 (0.36, 1.26)                   |
|               | N.F., Pakistan      | 165                | 0.51 (0.31, 0.82)       | 0.50 (0.31, 0.81)                 | 0.46 (0.28, 0.76)                   | 81                            | 0.38 (0.20, 0.71)       | 0.38 (0.20, 0.71)                 | 0.31 (0.17, 0.59)                   |
|               | Venda, South Africa | 46                 | 0.46 (0.12, 1.81)       | 0.46 (0.11, 1.81)                 | 0.42 (0.11, 1.69)                   | 6                             | —                       | —                                 | —                                   |
|               | Haydom, Tanzania    | 137                | 1.50 (0.96, 2.34)       | 1.48 (0.95, 2.31)                 | 1.38 (0.87, 2.18)                   | 19                            | 0.49 (0.14, 1.71)       | 0.49 (0.14, 1.70)                 | 0.40 (0.12, 1.41)                   |
| Astrovirus    | Dhaka, Bangladesh   | 374                | 0.74 (0.60, 0.91)       | 0.73 (0.59, 0.91)                 | 0.71 (0.55, 0.91)                   | 45                            | 0.76 (0.42, 1.37)       | 0.75 (0.42, 1.35)                 | 0.65 (0.36, 1.18)                   |
|               | Fortaleza, Brazil   | 23                 | 0.00 (0.00, 0.00)       | 0.00 (0.00, 0.00)                 | 0.00 (0.00, 0.00)                   | 3                             | —                       | —                                 | —                                   |
|               | Vellore, India      | 215                | 1.09 (0.79, 1.49)       | 1.05 (0.77, 1.45)                 | 1.02 (0.72, 1.44)                   | 37                            | 0.54 (0.25, 1.15)       | 0.54 (0.25, 1.18)                 | 0.47 (0.22, 1.03)                   |
|               | Bhaktapur, Nepal    | 180                | 0.89 (0.64, 1.22)       | 0.89 (0.65, 1.22)                 | 0.86 (0.61, 1.21)                   | 39                            | 0.99 (0.51, 1.92)       | 1.01 (0.52, 1.98)                 | 0.88 (0.45, 1.73)                   |
|               | Loreto, Peru        | 352                | 0.88 (0.73, 1.08)       | 0.87 (0.72, 1.06)                 | 0.84 (0.66, 1.07)                   | 110                           | 0.94 (0.64, 1.37)       | 0.92 (0.63, 1.35)                 | 0.80 (0.55, 1.18)                   |
|               | N.F., Pakistan      | 363                | 0.71 (0.57, 0.88)       | 0.70 (0.56, 0.87)                 | 0.67 (0.52, 0.88)                   | 57                            | 0.48 (0.28, 0.83)       | 0.47 (0.27, 0.83)                 | 0.41 (0.23, 0.72)                   |
|               | Venda, South Africa | 110                | 1.10 (0.63, 1.90)       | 1.09 (0.63, 1.87)                 | 1.05 (0.60, 1.83)                   | 4                             | —                       | —                                 | —                                   |
|               | Haydom, Tanzania    | 142                | 0.57 (0.39, 0.81)       | 0.56 (0.39, 0.81)                 | 0.54 (0.37, 0.80)                   | 7                             | —                       | —                                 | —                                   |
| Norovirus GII | Dhaka, Bangladesh   | 404                | 1.04 (0.85, 1.28)       | 1.01 (0.83, 1.24)                 | 1.02 (0.83, 1.25)                   | 43                            | 1.31 (0.67, 2.57)       | 1.26 (0.64, 2.48)                 | 1.21 (0.61, 2.41)                   |
|               | Fortaleza, Brazil   | 61                 | 0.81 (0.38, 1.74)       | 0.78 (0.37, 1.68)                 | 0.79 (0.37, 1.70)                   | 11                            | 0.99 (0.21, 4.66)       | 0.97 (0.20, 4.59)                 | 0.93 (0.20, 4.43)                   |
|               | Vellore, India      | 346                | 0.93 (0.75, 1.14)       | 0.92 (0.75, 1.13)                 | 0.92 (0.75, 1.14)                   | 13                            | 0.90 (0.30, 2.72)       | 0.90 (0.30, 2.73)                 | 0.86 (0.28, 2.65)                   |
|               | Bhaktapur, Nepal    | 321                | 1.15 (0.92, 1.43)       | 1.14 (0.91, 1.42)                 | 1.15 (0.92, 1.44)                   | 68                            | 0.69 (0.41, 1.15)       | 0.71 (0.42, 1.18)                 | 0.68 (0.40, 1.15)                   |
|               | Loreto, Peru        | 492                | 1.07 (0.92, 1.25)       | 1.05 (0.90, 1.23)                 | 1.06 (0.90, 1.24)                   | 119                           | 0.64 (0.44, 0.94)       | 0.66 (0.45, 0.97)                 | 0.63 (0.42, 0.95)                   |
|               | N.F., Pakistan      | 639                | 0.90 (0.76, 1.07)       | 0.89 (0.74, 1.06)                 | 0.89 (0.75, 1.07)                   | 13                            | 0.38 (0.13, 1.15)       | 0.39 (0.13, 1.16)                 | 0.37 (0.12, 1.13)                   |
|               | Venda, South Africa | 169                | 0.78 (0.55, 1.11)       | 0.77 (0.54, 1.10)                 | 0.78 (0.54, 1.11)                   | 9                             | —                       | —                                 | —                                   |
|               | Haydom, Tanzania    | 285                | 0.67 (0.53, 0.86)       | 0.66 (0.51, 0.84)                 | 0.66 (0.52, 0.85)                   | 17                            | 0.48 (0.18, 1.28)       | 0.47 (0.18, 1.24)                 | 0.45 (0.17, 1.20)                   |
| Sapovirus     | Dhaka, Bangladesh   | 512                | 1.07 (0.90, 1.28)       | 1.05 (0.88, 1.25)                 | 1.02 (0.85, 1.22)                   | 91                            | 1.45 (0.91, 2.30)       | 1.40 (0.88, 2.23)                 | 1.23 (0.77, 1.96)                   |
|               | Fortaleza, Brazil   | 69                 | 1.58 (0.91, 2.76)       | 1.56 (0.89, 2.74)                 | 1.52 (0.87, 2.66)                   | 8                             | —                       | —                                 | —                                   |
|               | Vellore, India      | 361                | 0.70 (0.56, 0.87)       | 0.68 (0.55, 0.85)                 | 0.66 (0.53, 0.83)                   | 64                            | 0.56 (0.33, 0.94)       | 0.54 (0.32, 0.92)                 | 0.48 (0.28, 0.81)                   |
|               | Bhaktapur, Nepal    | 350                | 1.08 (0.89, 1.32)       | 1.06 (0.87, 1.30)                 | 1.03 (0.84, 1.27)                   | 95                            | 1.07 (0.73, 1.56)       | 1.05 (0.72, 1.54)                 | 0.93 (0.63, 1.36)                   |
|               | Loreto, Peru        | 445                | 1.08 (0.90, 1.30)       | 1.05 (0.87, 1.25)                 | 1.02 (0.84, 1.23)                   | 187                           | 1.09 (0.82, 1.47)       | 1.07 (0.80, 1.44)                 | 0.94 (0.70, 1.27)                   |
|               | N.F., Pakistan      | 544                | 0.73 (0.61, 0.88)       | 0.71 (0.59, 0.85)                 | 0.69 (0.57, 0.84)                   | 58                            | 0.68 (0.39, 1.18)       | 0.65 (0.37, 1.13)                 | 0.57 (0.33, 1.00)                   |
|               | Venda, South Africa | 237                | 1.09 (0.83, 1.43)       | 1.07 (0.82, 1.41)                 | 1.04 (0.79, 1.37)                   | 8                             | —                       | —                                 | —                                   |
|               | Haydom, Tanzania    | 283                | 0.81 (0.63, 1.03)       | 0.80 (0.63, 1.02)                 | 0.78 (0.60, 1.00)                   | 15                            | 0.67 (0.25, 1.78)       | 0.66 (0.25, 1.76)                 | 0.58 (0.22, 1.55)                   |

|                                  |                     |     |                   |                   |                   |     |                   |                   |                   |
|----------------------------------|---------------------|-----|-------------------|-------------------|-------------------|-----|-------------------|-------------------|-------------------|
| Adenovirus<br>40/41              | Dhaka, Bangladesh   | 548 | 0.96 (0.79, 1.17) | 0.95 (0.78, 1.14) | 0.88 (0.72, 1.07) | 283 | 1.14 (0.86, 1.51) | 1.09 (0.82, 1.44) | 0.90 (0.67, 1.22) |
|                                  | Fortaleza, Brazil   | 69  | 0.54 (0.28, 1.04) | 0.53 (0.27, 1.03) | 0.49 (0.25, 0.96) | 5   | —                 | —                 | —                 |
|                                  | Vellore, India      | 330 | 1.06 (0.81, 1.39) | 1.04 (0.80, 1.36) | 0.97 (0.74, 1.27) | 26  | 0.80 (0.35, 1.84) | 0.76 (0.33, 1.76) | 0.63 (0.27, 1.47) |
|                                  | Bhaktapur, Nepal    | 167 | 0.92 (0.63, 1.33) | 0.92 (0.63, 1.33) | 0.85 (0.58, 1.24) | 12  | 0.00 (0.00, 0.00) | 0.00 (0.00, 0.00) | 0.00 (0.00, 0.00) |
|                                  | Loreto, Peru        | 498 | 1.10 (0.91, 1.33) | 1.08 (0.90, 1.30) | 1.01 (0.83, 1.22) | 51  | 1.25 (0.73, 2.13) | 1.21 (0.70, 2.07) | 1.00 (0.58, 1.73) |
|                                  | N.F., Pakistan      | 318 | 1.04 (0.83, 1.29) | 1.01 (0.80, 1.27) | 0.94 (0.74, 1.19) | 0   | —                 | —                 | —                 |
|                                  | Venda, South Africa | 131 | 1.00 (0.65, 1.54) | 1.00 (0.65, 1.53) | 0.93 (0.60, 1.43) | 4   | —                 | —                 | —                 |
|                                  | Haydom, Tanzania    | 203 | 0.85 (0.60, 1.21) | 0.84 (0.59, 1.20) | 0.78 (0.55, 1.12) | 9   | —                 | —                 | —                 |
| <i>Shigella</i>                  | Dhaka, Bangladesh   | 556 | 1.57 (1.31, 1.89) | 1.52 (1.27, 1.83) | 1.28 (0.93, 1.76) | 259 | 0.86 (0.67, 1.09) | 0.83 (0.65, 1.06) | 0.64 (0.50, 0.82) |
|                                  | Fortaleza, Brazil   | 72  | 2.29 (1.25, 4.21) | 2.18 (1.19, 3.98) | 1.82 (0.94, 3.52) | 12  | 1.76 (0.46, 6.71) | 1.74 (0.46, 6.56) | 1.34 (0.36, 5.07) |
|                                  | Vellore, India      | 410 | 1.31 (1.06, 1.63) | 1.26 (1.02, 1.56) | 1.06 (0.75, 1.48) | 95  | 0.89 (0.59, 1.33) | 0.88 (0.58, 1.32) | 0.68 (0.45, 1.02) |
|                                  | Bhaktapur, Nepal    | 242 | 3.30 (2.51, 4.33) | 3.28 (2.49, 4.32) | 2.75 (1.88, 4.02) | 78  | 1.15 (0.72, 1.86) | 1.12 (0.70, 1.80) | 0.86 (0.54, 1.40) |
|                                  | Loreto, Peru        | 487 | 3.02 (2.50, 3.65) | 2.94 (2.43, 3.56) | 2.46 (1.78, 3.40) | 150 | 1.90 (1.34, 2.69) | 1.83 (1.29, 2.60) | 1.41 (0.99, 2.02) |
|                                  | N.F., Pakistan      | 190 | 1.31 (0.99, 1.74) | 1.31 (0.98, 1.74) | 1.09 (0.74, 1.61) | 102 | 0.99 (0.65, 1.53) | 0.94 (0.60, 1.45) | 0.72 (0.47, 1.12) |
|                                  | Venda, South Africa | 152 | 1.43 (1.03, 1.99) | 1.42 (1.02, 1.97) | 1.19 (0.78, 1.81) | 10  | 0.73 (0.15, 3.46) | 0.73 (0.15, 3.46) | 0.57 (0.12, 2.67) |
|                                  | Haydom, Tanzania    | 539 | 1.16 (0.95, 1.42) | 1.14 (0.94, 1.39) | 0.96 (0.69, 1.33) | 13  | 0.16 (0.05, 0.55) | 0.16 (0.05, 0.55) | 0.13 (0.04, 0.42) |
| ST-EPEC                          | Dhaka, Bangladesh   | 905 | 1.02 (0.87, 1.20) | 1.01 (0.86, 1.19) | 0.99 (0.83, 1.17) | 205 | 0.98 (0.68, 1.41) | 0.96 (0.66, 1.39) | 0.81 (0.55, 1.20) |
|                                  | Fortaleza, Brazil   | 43  | 1.50 (0.71, 3.14) | 1.45 (0.69, 3.05) | 1.42 (0.67, 2.97) | 4   | —                 | —                 | —                 |
|                                  | Vellore, India      | 379 | 0.86 (0.70, 1.05) | 0.85 (0.70, 1.04) | 0.83 (0.67, 1.02) | 55  | 1.00 (0.59, 1.69) | 0.98 (0.58, 1.66) | 0.83 (0.48, 1.42) |
|                                  | Bhaktapur, Nepal    | 463 | 1.09 (0.91, 1.31) | 1.09 (0.91, 1.31) | 1.06 (0.88, 1.28) | 66  | 2.28 (1.32, 3.93) | 2.29 (1.32, 3.98) | 1.93 (1.10, 3.40) |
|                                  | Loreto, Peru        | 340 | 1.30 (1.06, 1.59) | 1.27 (1.04, 1.56) | 1.24 (1.01, 1.52) | 56  | 1.77 (1.06, 2.96) | 1.75 (1.04, 2.94) | 1.47 (0.86, 2.52) |
|                                  | N.F., Pakistan      | 292 | 1.17 (0.92, 1.49) | 1.15 (0.90, 1.46) | 1.12 (0.88, 1.43) | 31  | 1.59 (0.80, 3.18) | 1.56 (0.78, 3.12) | 1.31 (0.65, 2.66) |
|                                  | Venda, South Africa | 107 | 1.00 (0.61, 1.62) | 0.98 (0.60, 1.60) | 0.96 (0.59, 1.56) | 4   | —                 | —                 | —                 |
|                                  | Haydom, Tanzania    | 687 | 1.02 (0.85, 1.22) | 1.00 (0.84, 1.21) | 0.98 (0.81, 1.18) | 25  | 0.81 (0.36, 1.80) | 0.80 (0.36, 1.79) | 0.68 (0.30, 1.53) |
| tEPEC                            | Dhaka, Bangladesh   | 617 | 1.15 (0.98, 1.35) | 1.13 (0.96, 1.32) | 1.08 (0.86, 1.35) | 2   | —                 | —                 | —                 |
|                                  | Fortaleza, Brazil   | 50  | 1.34 (0.65, 2.74) | 1.31 (0.64, 2.71) | 1.26 (0.60, 2.63) | 0   | —                 | —                 | —                 |
|                                  | Vellore, India      | 510 | 0.97 (0.81, 1.17) | 0.96 (0.79, 1.16) | 0.91 (0.71, 1.17) | 8   | —                 | —                 | —                 |
|                                  | Bhaktapur, Nepal    | 304 | 1.80 (1.44, 2.23) | 1.77 (1.42, 2.19) | 1.69 (1.29, 2.21) | 5   | —                 | —                 | —                 |
|                                  | Loreto, Peru        | 436 | 1.77 (1.47, 2.13) | 1.72 (1.43, 2.07) | 1.64 (1.29, 2.10) | 2   | —                 | —                 | —                 |
|                                  | N.F., Pakistan      | 307 | 0.81 (0.64, 1.01) | 0.79 (0.63, 1.00) | 0.76 (0.57, 1.00) | 11  | 0.55 (0.11, 2.75) | 0.52 (0.11, 2.49) | 0.37 (0.08, 1.78) |
|                                  | Venda, South Africa | 110 | 1.03 (0.66, 1.58) | 1.02 (0.66, 1.57) | 0.97 (0.61, 1.55) | 1   | —                 | —                 | —                 |
|                                  | Haydom, Tanzania    | 515 | 0.79 (0.64, 0.98) | 0.79 (0.64, 0.97) | 0.75 (0.58, 0.98) | 2   | —                 | —                 | —                 |
| <i>Campylobacter jejuni/coli</i> | Dhaka, Bangladesh   | 804 | 1.77 (1.49, 2.11) | 1.70 (1.42, 2.02) | 1.67 (1.39, 2.00) | 1   | —                 | —                 | —                 |
|                                  | Fortaleza, Brazil   | 32  | 2.10 (0.88, 5.03) | 2.01 (0.83, 4.84) | 1.97 (0.82, 4.77) | 5   | —                 | —                 | —                 |
|                                  | Vellore, India      | 281 | 1.36 (1.03, 1.82) | 1.30 (0.98, 1.73) | 1.28 (0.96, 1.71) | 28  | 1.97 (0.90, 4.31) | 1.86 (0.86, 4.06) | 1.97 (0.90, 4.31) |
|                                  | Bhaktapur, Nepal    | 677 | 1.54 (1.30, 1.83) | 1.50 (1.26, 1.79) | 1.48 (1.24, 1.77) | 2   | —                 | —                 | —                 |
|                                  | Loreto, Peru        | 552 | 1.34 (1.12, 1.59) | 1.30 (1.09, 1.54) | 1.28 (1.07, 1.53) | 109 | 1.14 (0.72, 1.81) | 1.10 (0.70, 1.75) | 1.16 (0.73, 1.86) |
|                                  | N.F., Pakistan      | 266 | 1.40 (1.05, 1.85) | 1.32 (0.99, 1.75) | 1.30 (0.97, 1.73) | 4   | —                 | —                 | —                 |
|                                  | Venda, South Africa | 84  | 1.69 (1.06, 2.69) | 1.68 (1.06, 2.67) | 1.65 (1.04, 2.63) | 6   | —                 | —                 | —                 |

|                        |                     |                   |                   |                   |                   |    |                   |                   |                   |
|------------------------|---------------------|-------------------|-------------------|-------------------|-------------------|----|-------------------|-------------------|-------------------|
| <i>Cryptosporidium</i> | Haydom, Tanzania    | 900               | 1.70 (1.38, 2.10) | 1.64 (1.33, 2.02) | 1.61 (1.30, 1.99) | 1  | 0.00 (0.00, 0.00) | 0.00 (0.00, 0.00) | 0.00 (0.00, 0.00) |
|                        | Dhaka, Bangladesh   | 212               | 1.08 (0.79, 1.46) | 1.05 (0.77, 1.43) | 0.95 (0.65, 1.39) | 18 | 0.33 (0.09, 1.14) | 0.31 (0.09, 1.07) | 0.25 (0.07, 0.88) |
|                        | Fortaleza, Brazil   | 14                | 0.00 (0.00, 0.00) | 0.00 (0.00, 0.00) | 0.00 (0.00, 0.00) | 0  | —                 | —                 | —                 |
|                        | Vellore, India      | 141               | 0.64 (0.44, 0.94) | 0.61 (0.42, 0.90) | 0.55 (0.35, 0.86) | 15 | 0.33 (0.08, 1.37) | 0.31 (0.08, 1.28) | 0.25 (0.06, 1.05) |
|                        | Bhaktapur, Nepal    | 174               | 1.72 (1.21, 2.44) | 1.67 (1.17, 2.37) | 1.51 (0.99, 2.29) | 13 | 0.29 (0.04, 2.30) | 0.28 (0.03, 2.24) | 0.22 (0.03, 1.83) |
|                        | Loreto, Peru        | 342               | 1.27 (1.02, 1.58) | 1.21 (0.97, 1.51) | 1.09 (0.80, 1.50) | 49 | 0.47 (0.26, 0.84) | 0.46 (0.25, 0.84) | 0.37 (0.20, 0.68) |
|                        | N.F., Pakistan      | 180               | 0.57 (0.40, 0.82) | 0.54 (0.37, 0.78) | 0.49 (0.32, 0.75) | 14 | 0.50 (0.15, 1.66) | 0.50 (0.15, 1.63) | 0.40 (0.12, 1.33) |
|                        | Venda, South Africa | 91                | 0.39 (0.17, 0.89) | 0.38 (0.17, 0.88) | 0.35 (0.15, 0.82) | 0  | —                 | —                 | —                 |
| Haydom, Tanzania       | 299                 | 0.70 (0.56, 0.89) | 0.69 (0.54, 0.87) | 0.62 (0.45, 0.86) | 2                 | —  | —                 | —                 |                   |

\*Hazard ratio adjusted for site

†Hazard ratio adjusted for site, SES, sex, enrollment WAZ, maternal education, maternal height, crowding, and exclusive breastfeeding in first 6 months

‡Hazard ratio adjusted for the same variables above and calibrated based on negative control estimates calculated across sites

§Not estimated if fewer than 10 total diarrhea episodes at the site

N. F., Pakistan = Naushero Feroze, Pakistan



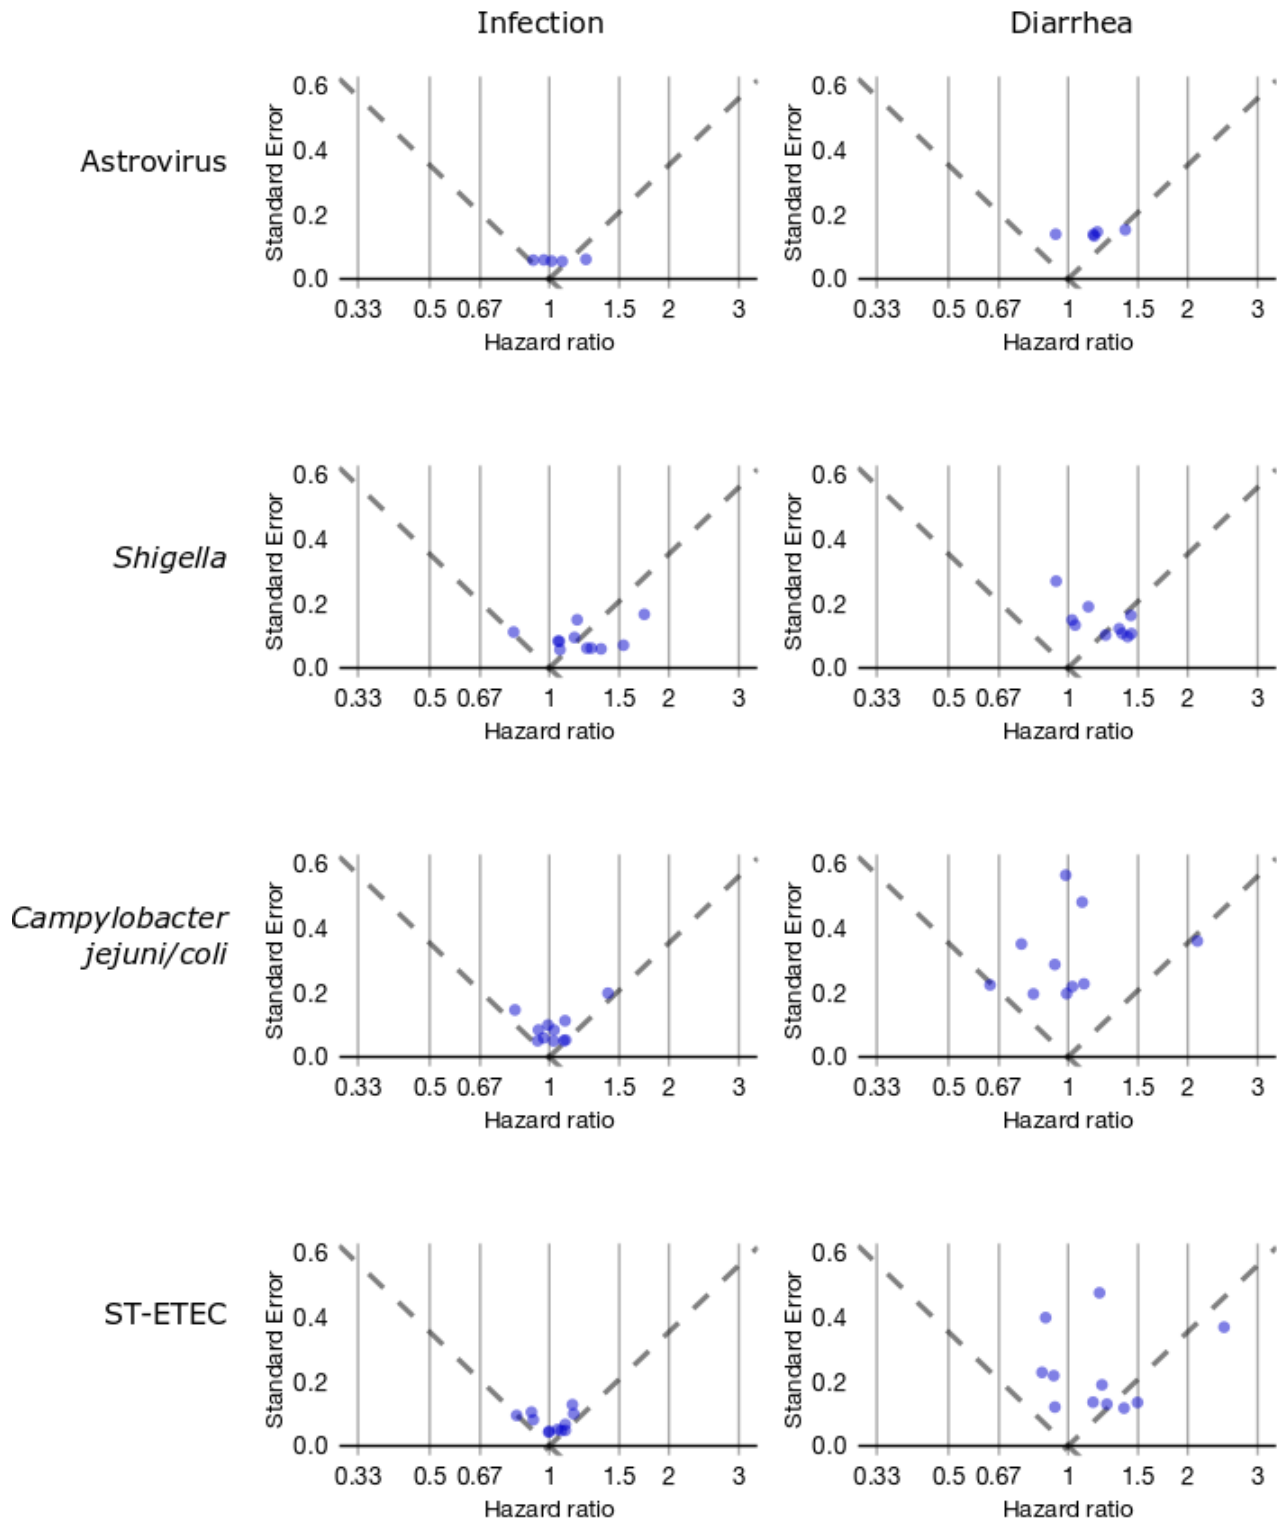

**Figure S2.** Funnel plots of the negative control estimates. Each dot represents one negative control association between 1+ prior infections with another pathogen of the same type (bacteria, viruses, parasites; i.e. a negative control pathogen) and subsequent infection or diarrhea due to the pathogen of interest (listed on left). Extreme estimates were excluded (hazard ratio < 0.001 or standard error  $\geq 0.8$ ). For the expected null distribution, the negative control estimates are expected to be centered around a hazard ratio of 1 and 95% of the estimates are expected to lie between the two dotted gray lines. Deviations from this expected distribution indicate the direction and magnitude of systematic error.

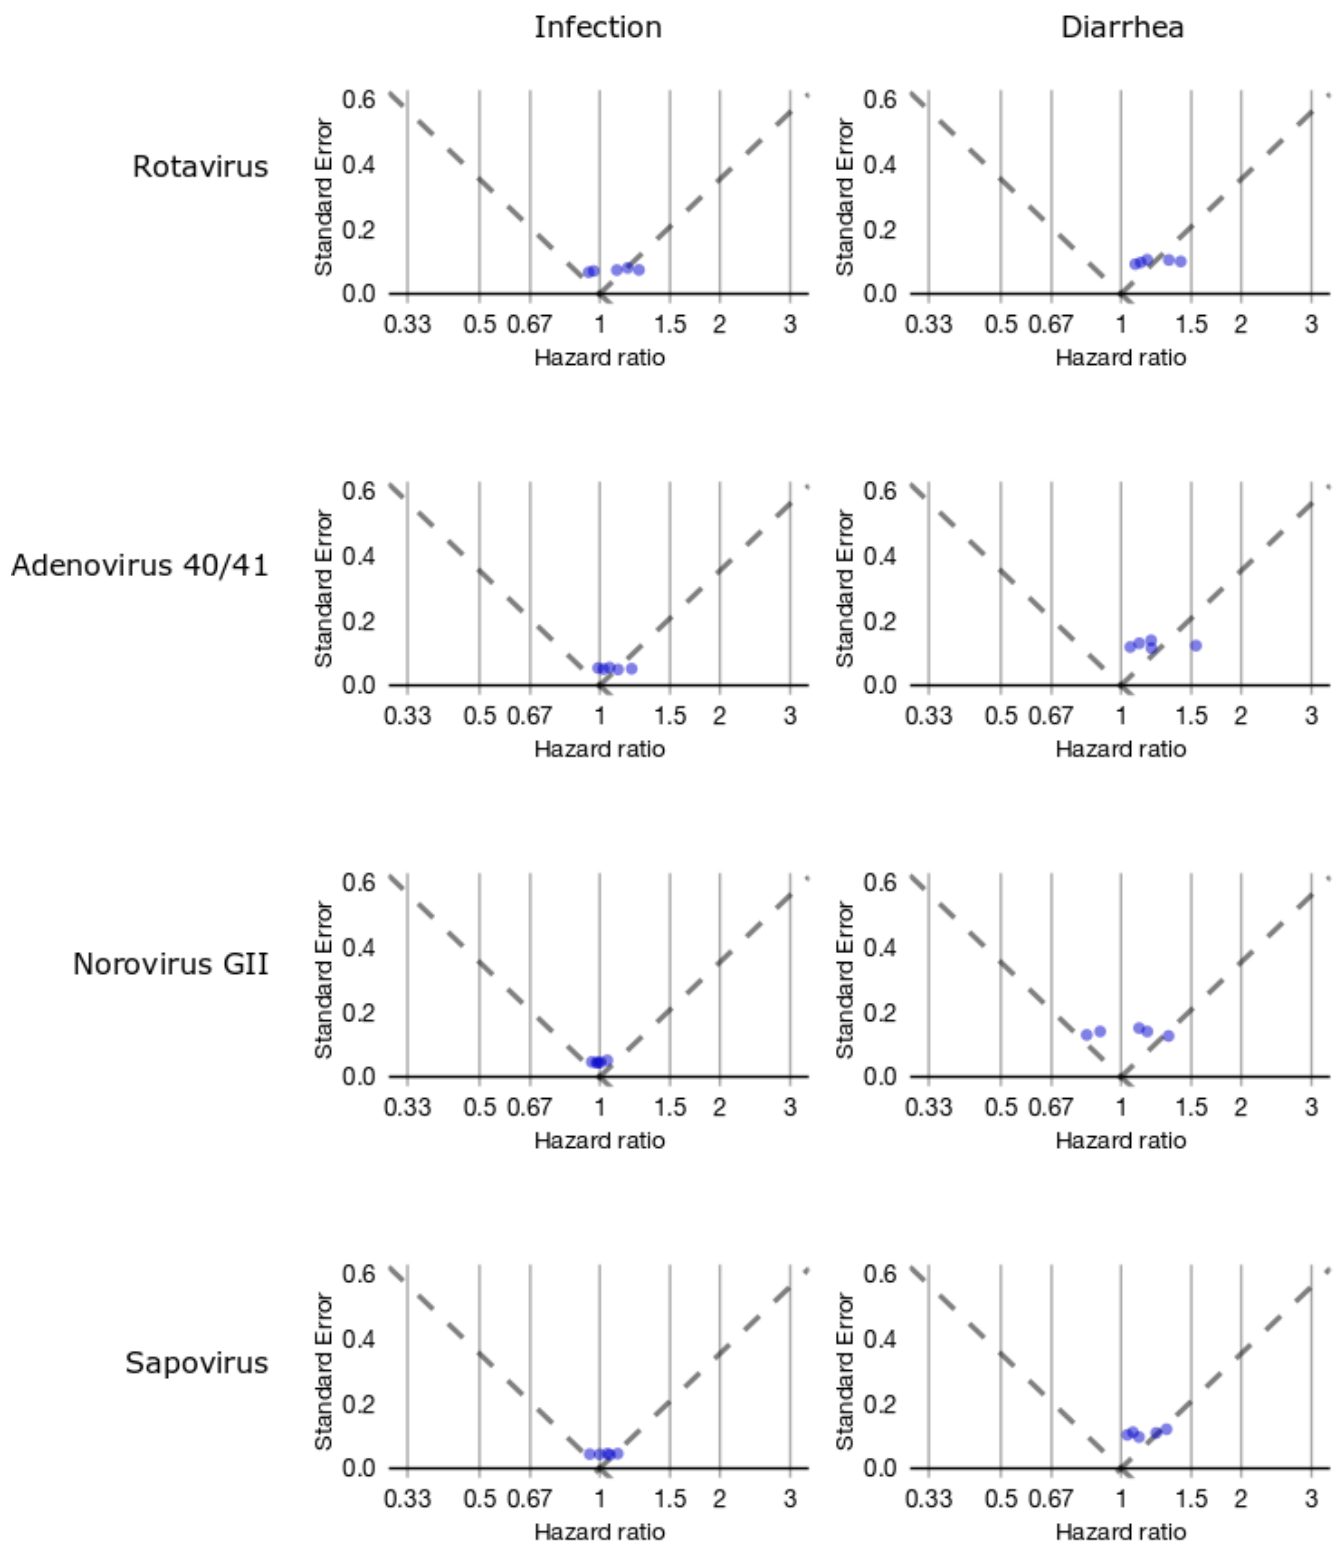

Figure S2 continued.

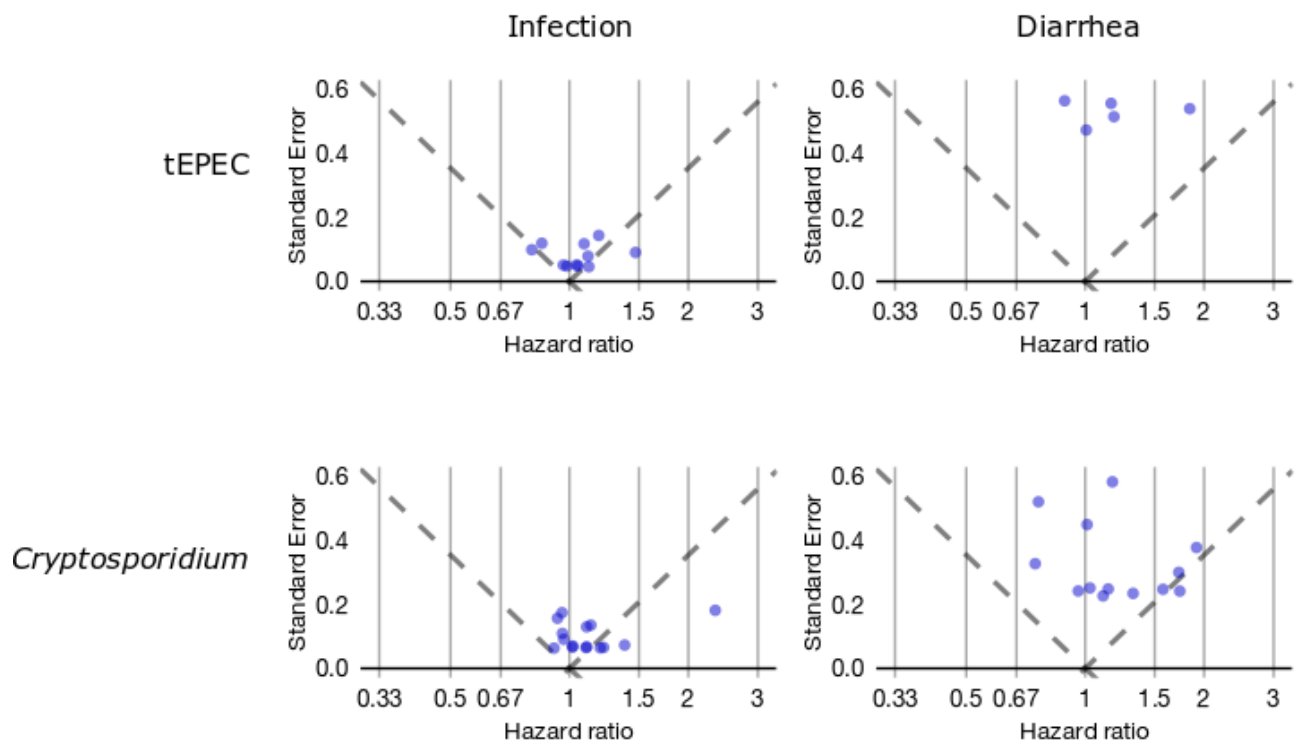

Figure S2 continued.

## Sensitivity analyses

**Table S5.** Age-specific estimates of protection against infection and attributable diarrhea due to one or more prior infections from the same pathogen in the MAL-ED cohort.

| Pathogen         | Age (months) | # previous infections* | Infection outcome |                                 |                          | Attributable diarrhea outcome       |                                |                          |                                     |
|------------------|--------------|------------------------|-------------------|---------------------------------|--------------------------|-------------------------------------|--------------------------------|--------------------------|-------------------------------------|
|                  |              |                        | N                 | N (%) with subsequent infection | HR <sup>†</sup> (95% CI) | Calibrated <sup>‡</sup> HR (95% CI) | N (%) with subsequent diarrhea | HR <sup>†</sup> (95% CI) | Calibrated <sup>‡</sup> HR (95% CI) |
| Rotavirus        | 0-11         | 0                      | 1715              | 575 (33.5)                      | 1.                       | 1.                                  | 246 (14.3)                     | 1.                       | 1.                                  |
|                  |              | 1+                     | 563               | 123 (21.8)                      | 0.80 (0.65, 0.98)        | 0.73 (0.59, 0.91)                   | 68 (12.1)                      | 0.64 (0.49, 0.84)        | 0.53 (0.40, 0.70)                   |
|                  | 12-23        | 0                      | 1140              | 264 (23.2)                      | 1.                       | 1.                                  | 129 (11.3)                     | 1.                       | 1.                                  |
|                  |              | 1+                     | 839               | 200 (23.8)                      | 0.83 (0.67, 1.02)        | 0.75 (0.58, 0.97)                   | 98 (11.7)                      | 0.62 (0.46, 0.82)        | 0.50 (0.37, 0.68)                   |
| Astrovirus       | 0-11         | 0                      | 1715              | 662 (38.6)                      | 1.                       | 1.                                  | 104 (6.1)                      | 1.                       | 1.                                  |
|                  |              | 1+                     | 645               | 149 (23.1)                      | 0.75 (0.62, 0.89)        | 0.72 (0.58, 0.89)                   | 28 (4.4)                       | 0.74 (0.48, 1.15)        | 0.60 (0.38, 0.94)                   |
|                  | 12-23        | 0                      | 1053              | 386 (36.7)                      | 1.                       | 1.                                  | 73 (6.9)                       | 1.                       | 1.                                  |
|                  |              | 1+                     | 1047              | 398 (38.0)                      | 0.83 (0.71, 0.96)        | 0.80 (0.68, 0.93)                   | 92 (8.8)                       | 0.68 (0.49, 0.94)        | 0.62 (0.44, 0.87)                   |
| Norovirus GII    | 0-11         | 0                      | 1715              | 1038 (60.5)                     | 1.                       | 1.                                  | 99 (5.8)                       | 1.                       | 1.                                  |
|                  |              | 1+                     | 1022              | 437 (42.8)                      | 0.97 (0.86, 1.09)        | 0.93 (0.83, 1.05)                   | 51 (5.0)                       | 0.72 (0.50, 1.04)        | 0.61 (0.40, 0.93)                   |
|                  | 12-23        | 0                      | 677               | 272 (40.2)                      | 1.                       | 1.                                  | 41 (6.1)                       | 1.                       | 1.                                  |
|                  |              | 1+                     | 1310              | 589 (45.0)                      | 0.82 (0.71, 0.96)        | 0.86 (0.74, 1.00)                   | 92 (7.0)                       | 0.58 (0.38, 0.89)        | 0.64 (0.41, 0.99)                   |
| Sapovirus        | 0-11         | 0                      | 1715              | 837 (48.8)                      | 1.                       | 1.                                  | 145 (8.5)                      | 1.                       | 1.                                  |
|                  |              | 1+                     | 804               | 255 (31.7)                      | 0.93 (0.80, 1.07)        | 0.87 (0.75, 1.01)                   | 47 (5.9)                       | 0.68 (0.48, 0.95)        | 0.55 (0.39, 0.78)                   |
|                  | 12-23        | 0                      | 878               | 513 (58.4)                      | 1.                       | 1.                                  | 84 (9.6)                       | 1.                       | 1.                                  |
|                  |              | 1+                     | 1349              | 748 (55.4)                      | 0.87 (0.77, 0.97)        | 0.87 (0.76, 1.00)                   | 212 (15.7)                     | 1.13 (0.86, 1.48)        | 1.07 (0.81, 1.42)                   |
| Adenovirus 40/41 | 0-11         | 0                      | 1715              | 720 (42.0)                      | 1.                       | 1.                                  | 129 (7.5)                      | 1.                       | 1.                                  |
|                  |              | 1+                     | 705               | 230 (32.6)                      | 1.15 (0.98, 1.35)        | 1.11 (0.94, 1.31)                   | 69 (9.8)                       | 1.09 (0.79, 1.50)        | 0.95 (0.68, 1.31)                   |
|                  | 12-23        | 0                      | 995               | 441 (44.3)                      | 1.                       | 1.                                  | 37 (3.7)                       | 1.                       | 1.                                  |
|                  |              | 1+                     | 1160              | 500 (43.1)                      | 0.85 (0.74, 0.98)        | 0.78 (0.66, 0.93)                   | 108 (9.3)                      | 0.96 (0.65, 1.41)        | 0.76 (0.51, 1.14)                   |
| <i>Shigella</i>  | 0-11         | 0                      | 1715              | 401 (23.4)                      | 1.                       | 1.                                  | 117 (6.8)                      | 1.                       | 1.                                  |
|                  |              | 1+                     | 388               | 123 (31.7)                      | 2.59 (2.05, 3.26)        | 2.01 (1.57, 2.57)                   | 21 (5.4)                       | 1.39 (0.85, 2.29)        | 0.85 (0.52, 1.40)                   |
|                  | 12-23        | 0                      | 1314              | 740 (56.3)                      | 1.                       | 1.                                  | 274 (20.9)                     | 1.                       | 1.                                  |
|                  |              | 1+                     | 1134              | 689 (60.8)                      | 1.53 (1.37, 1.69)        | 1.35 (1.10, 1.66)                   | 234 (20.7)                     | 0.97 (0.80, 1.17)        | 0.75 (0.61, 0.91)                   |
| ST-EPEC          | 0-11         | 0                      | 1715              | 768 (44.8)                      | 1.                       | 1.                                  | 92 (5.4)                       | 1.                       | 1.                                  |
|                  |              | 1+                     | 758               | 285 (37.6)                      | 1.08 (0.94, 1.24)        | 1.05 (0.91, 1.21)                   | 60 (7.9)                       | 0.96 (0.69, 1.35)        | 0.81 (0.57, 1.15)                   |
|                  | 12-23        | 0                      | 947               | 476 (50.3)                      | 1.                       | 1.                                  | 45 (4.8)                       | 1.                       | 1.                                  |
|                  |              | 1+                     | 1244              | 775 (62.3)                      | 1.01 (0.90, 1.14)        | 1.00 (0.88, 1.13)                   | 190 (15.3)                     | 1.63 (1.16, 2.31)        | 1.38 (0.95, 1.99)                   |
| tEPEC            | 0-11         | 0                      | 1715              | 913 (53.2)                      | 1.                       | 1.                                  | 20 (1.2)                       | 1.                       | 1.                                  |
|                  |              | 1+                     | 899               | 393 (43.7)                      | 1.15 (1.01, 1.31)        | 1.16 (0.95, 1.42)                   | 6 (0.7)                        | 1.23 (0.46, 3.29)        | 0.77 (0.28, 2.16)                   |
|                  | 12-23        | 0                      | 802               | 338 (42.1)                      | 1.                       | 1.                                  | 3 (0.4)                        | 1.                       | 1.                                  |

|                                  |       |       |      |            |                   |                   |          |                   |                   |
|----------------------------------|-------|-------|------|------------|-------------------|-------------------|----------|-------------------|-------------------|
|                                  |       | 1+    | 1250 | 680 (54.4) | 0.97 (0.85, 1.12) | 0.92 (0.80, 1.06) | 2 (0.2)  | 0.23 (0.06, 0.92) | 0.16 (0.04, 0.66) |
| <i>Campylobacter jejuni/coli</i> | 0-11  | 0     | 1715 | 927 (54.1) | 1.                | 1.                | 61 (3.6) | 1.                | 1.                |
|                                  |       | 1+    | 909  | 476 (52.4) | 1.62 (1.43, 1.83) | 1.60 (1.41, 1.82) | 33 (3.6) | 1.36 (0.83, 2.22) | 1.33 (0.79, 2.22) |
|                                  |       | 12-23 | 0    | 788        | 264 (33.5)        | 1.                | 1.       | 12 (1.5)          | 1.                |
| <i>Cryptosporidium</i>           | 0-11  | 1+    | 1191 | 702 (58.9) | 1.26 (1.08, 1.47) | 1.26 (1.06, 1.49) | 43 (3.6) | 1.08 (0.51, 2.30) | 1.14 (0.53, 2.45) |
|                                  |       | 0     | 1715 | 339 (19.8) | 1.                | 1.                | 32 (1.9) | 1.                | 1.                |
|                                  | 12-23 | 1+    | 324  | 63 (19.4)  | 1.76 (1.28, 2.42) | 1.52 (0.95, 2.43) | 32 (9.9) | 0.00 (0.00, 0.00) | 0.00 (0.00, 0.00) |
|                                  |       | 0     | 1376 | 611 (44.4) | 1.                | 1.                | 54 (3.9) | 1.                | 1.                |
|                                  |       | 1+    | 948  | 312 (32.9) | 0.75 (0.66, 0.87) | 0.71 (0.61, 0.82) | 24 (2.5) | 0.43 (0.26, 0.71) | 0.35 (0.21, 0.58) |

\*Previous infections from age 0-11 months were included in the exposure classification for the 12-23 month age group

†Hazard ratio adjusted for site, SES, sex, enrollment WAZ, maternal education, maternal height, crowding, and exclusive breastfeeding in first 6 months

‡Hazard ratio adjusted for the same variables above and calibrated based on negative control estimates

**Table S6.** Estimates of protection with cut-off for pathogen quantity detected to define infections at Cq < 35 instead of Cq ≤ 30.

| Pathogen                         | # previous infections | N    | Infection outcome               |                   |                         | Attributable diarrhea outcome  |                   |                         |
|----------------------------------|-----------------------|------|---------------------------------|-------------------|-------------------------|--------------------------------|-------------------|-------------------------|
|                                  |                       |      | N (%) with subsequent infection | HR* (95% CI)      | Calibrated† HR (95% CI) | N (%) with subsequent diarrhea | HR* (95% CI)      | Calibrated† HR (95% CI) |
| Rotavirus                        | 0                     | 1715 | 1098 (64.0)                     | 1.                | 1.                      | 294 (17.1)                     | 1.                | 1.                      |
|                                  | 1                     | 1098 | 530 (48.3)                      | 0.99 (0.87, 1.11) | 0.92 (0.77, 1.10)       | 139 (12.7)                     | 0.71 (0.57, 0.89) | 0.60 (0.48, 0.76)       |
|                                  | 2+                    | 530  | 222 (41.9)                      | 1.07 (0.91, 1.26) | 0.97 (0.81, 1.16)       | 92 (17.4)                      | 0.72 (0.56, 0.93) | 0.56 (0.42, 0.73)       |
| Astrovirus                       | 0                     | 1715 | 1376 (80.2)                     | 1.                | 1.                      | 82 (4.8)                       | 1.                | 1.                      |
|                                  | 1                     | 1376 | 1023 (74.3)                     | 1.15 (1.05, 1.26) | 1.09 (0.92, 1.30)       | 80 (5.8)                       | 1.19 (0.85, 1.66) | 1.04 (0.74, 1.46)       |
|                                  | 2+                    | 1023 | 773 (75.6)                      | 1.24 (1.11, 1.38) | 1.22 (1.05, 1.40)       | 120 (11.7)                     | 0.93 (0.65, 1.35) | 0.76 (0.52, 1.10)       |
| Norovirus GII                    | 0                     | 1715 | 1561 (91.0)                     | 1.                | 1.                      | 120 (7.0)                      | 1.                | 1.                      |
|                                  | 1                     | 1561 | 1298 (83.2)                     | 1.26 (1.15, 1.37) | 1.25 (1.14, 1.37)       | 65 (4.2)                       | 0.58 (0.41, 0.81) | 0.55 (0.38, 0.81)       |
|                                  | 2+                    | 1298 | 953 (73.4)                      | 1.04 (0.95, 1.14) | 1.10 (1.00, 1.22)       | 98 (7.6)                       | 0.42 (0.29, 0.59) | 0.41 (0.29, 0.58)       |
| Sapovirus                        | 0                     | 1715 | 1579 (92.1)                     | 1.                | 1.                      | 150 (8.7)                      | 1.                | 1.                      |
|                                  | 1                     | 1579 | 1329 (84.2)                     | 1.15 (1.06, 1.25) | 1.14 (1.03, 1.25)       | 126 (8.0)                      | 0.89 (0.70, 1.13) | 0.79 (0.62, 1.01)       |
|                                  | 2+                    | 1329 | 1003 (75.5)                     | 1.09 (1.00, 1.19) | 1.02 (0.93, 1.12)       | 203 (15.3)                     | 0.77 (0.59, 1.01) | 0.63 (0.48, 0.83)       |
| Adenovirus 40/41                 | 0                     | 1715 | 1508 (87.9)                     | 1.                | 1.                      | 88 (5.1)                       | 1.                | 1.                      |
|                                  | 1                     | 1508 | 1158 (76.8)                     | 1.13 (1.04, 1.23) | 1.04 (0.94, 1.16)       | 70 (4.6)                       | 0.88 (0.62, 1.25) | 0.75 (0.52, 1.07)       |
|                                  | 2+                    | 1158 | 858 (74.1)                      | 1.35 (1.23, 1.49) | 1.27 (1.13, 1.42)       | 163 (14.1)                     | 1.03 (0.72, 1.47) | 0.79 (0.55, 1.14)       |
| <i>Shigella</i>                  | 0                     | 1715 | 1407 (82.0)                     | 1.                | 1.                      | 311 (18.1)                     | 1.                | 1.                      |
|                                  | 1                     | 1407 | 1047 (74.4)                     | 1.60 (1.46, 1.76) | 1.38 (1.16, 1.66)       | 164 (11.7)                     | 0.92 (0.75, 1.12) | 0.73 (0.59, 0.90)       |
|                                  | 2+                    | 1047 | 723 (69.1)                      | 1.99 (1.81, 2.19) | 1.60 (1.12, 2.28)       | 192 (18.3)                     | 0.93 (0.75, 1.14) | 0.65 (0.52, 0.81)       |
| ST-EPEC                          | 0                     | 1715 | 1453 (84.7)                     | 1.                | 1.                      | 71 (4.1)                       | 1.                | 1.                      |
|                                  | 1                     | 1453 | 1172 (80.7)                     | 1.14 (1.05, 1.24) | 1.11 (1.01, 1.22)       | 97 (6.7)                       | 1.62 (1.17, 2.24) | 1.39 (0.99, 1.96)       |
|                                  | 2+                    | 1172 | 912 (77.8)                      | 1.19 (1.09, 1.30) | 1.14 (1.04, 1.26)       | 204 (17.4)                     | 1.65 (1.19, 2.28) | 1.26 (0.90, 1.76)       |
| tEPEC                            | 0                     | 1715 | 1458 (85.0)                     | 1.                | 1.                      | 19 (1.1)                       | 1.                | 1.                      |
|                                  | 1                     | 1458 | 1159 (79.5)                     | 1.23 (1.12, 1.35) | 1.18 (0.97, 1.43)       | 7 (0.5)                        | 1.15 (0.45, 2.93) | 0.70 (0.27, 1.84)       |
|                                  | 2+                    | 1159 | 846 (73.0)                      | 1.15 (1.04, 1.26) | 1.03 (0.80, 1.34)       | 5 (0.4)                        | 0.88 (0.27, 2.89) | 0.78 (0.21, 2.97)       |
| <i>Campylobacter jejuni/coli</i> | 0                     | 1715 | 1507 (87.9)                     | 1.                | 1.                      | 54 (3.1)                       | 1.                | 1.                      |
|                                  | 1                     | 1507 | 1288 (85.5)                     | 1.60 (1.47, 1.75) | 1.61 (1.46, 1.77)       | 42 (2.8)                       | 1.52 (0.97, 2.39) | 1.57 (0.97, 2.55)       |
|                                  | 2+                    | 1288 | 1071 (83.2)                     | 1.89 (1.74, 2.06) | 1.81 (1.64, 1.99)       | 52 (4.0)                       | 1.30 (0.79, 2.15) | 1.31 (0.79, 2.18)       |
| <i>Cryptosporidium</i>           | 0                     | 1715 | 1236 (72.1)                     | 1.                | 1.                      | 67 (3.9)                       | 1.                | 1.                      |
|                                  | 1                     | 1236 | 819 (66.3)                      | 1.71 (1.53, 1.92) | 1.56 (1.26, 1.91)       | 27 (2.2)                       | 0.83 (0.52, 1.33) | 0.68 (0.42, 1.11)       |
|                                  | 2+                    | 819  | 484 (59.1)                      | 1.72 (1.52, 1.95) | 1.47 (1.06, 2.05)       | 17 (2.1)                       | 0.36 (0.20, 0.64) | 0.27 (0.15, 0.49)       |

\*Hazard ratio adjusted for site, SES, sex, enrollment WAZ, maternal education, maternal height, crowding, and exclusive breastfeeding in first 6 months

†Hazard ratio adjusted for the same variables above and calibrated based on negative control estimates

**Table S7.** Estimates of protection with minimum duration between new infections at 14 days instead of 21.

| Pathogen                         | # previous infections | N    | Infection outcome               |                   |                         | Attributable diarrhea outcome  |                   |                         |
|----------------------------------|-----------------------|------|---------------------------------|-------------------|-------------------------|--------------------------------|-------------------|-------------------------|
|                                  |                       |      | N (%) with subsequent infection | HR* (95% CI)      | Calibrated† HR (95% CI) | N (%) with subsequent diarrhea | HR* (95% CI)      | Calibrated† HR (95% CI) |
| Rotavirus                        | 0                     | 1715 | 839 (48.9)                      | 1.                | 1.                      | 374 (21.8)                     | 1.                | 1.                      |
|                                  | 1                     | 839  | 284 (33.8)                      | 0.86 (0.74, 1.01) | 0.81 (0.66, 0.99)       | 122 (14.5)                     | 0.62 (0.50, 0.78) | 0.53 (0.42, 0.66)       |
|                                  | 2+                    | 284  | 84 (29.6)                       | 0.87 (0.67, 1.12) | 0.79 (0.60, 1.02)       | 50 (17.6)                      | 0.63 (0.47, 0.85) | 0.48 (0.35, 0.67)       |
| Astrovirus                       | 0                     | 1715 | 1048 (61.1)                     | 1.                | 1.                      | 174 (10.1)                     | 1.                | 1.                      |
|                                  | 1                     | 1048 | 492 (46.9)                      | 0.85 (0.76, 0.96) | 0.81 (0.67, 0.98)       | 83 (7.9)                       | 0.75 (0.57, 0.99) | 0.66 (0.50, 0.87)       |
|                                  | 2+                    | 492  | 181 (36.8)                      | 0.78 (0.66, 0.92) | 0.77 (0.64, 0.93)       | 45 (9.1)                       | 0.71 (0.49, 1.03) | 0.58 (0.40, 0.84)       |
| Norovirus GII                    | 0                     | 1715 | 1310 (76.4)                     | 1.                | 1.                      | 138 (8.0)                      | 1.                | 1.                      |
|                                  | 1                     | 1310 | 812 (62.0)                      | 1.02 (0.92, 1.13) | 1.02 (0.91, 1.13)       | 90 (6.9)                       | 0.79 (0.59, 1.05) | 0.75 (0.53, 1.06)       |
|                                  | 2+                    | 812  | 397 (48.9)                      | 0.86 (0.76, 0.97) | 0.91 (0.80, 1.03)       | 63 (7.8)                       | 0.56 (0.40, 0.77) | 0.55 (0.39, 0.76)       |
| Sapovirus                        | 0                     | 1715 | 1350 (78.7)                     | 1.                | 1.                      | 227 (13.2)                     | 1.                | 1.                      |
|                                  | 1                     | 1350 | 841 (62.3)                      | 0.96 (0.87, 1.06) | 0.95 (0.85, 1.06)       | 149 (11.0)                     | 0.88 (0.71, 1.10) | 0.79 (0.63, 0.98)       |
|                                  | 2+                    | 841  | 425 (50.5)                      | 0.88 (0.78, 0.98) | 0.82 (0.73, 0.93)       | 130 (15.5)                     | 1.08 (0.86, 1.37) | 0.89 (0.69, 1.13)       |
| Adenovirus 40/41                 | 0                     | 1715 | 1161 (67.7)                     | 1.                | 1.                      | 164 (9.6)                      | 1.                | 1.                      |
|                                  | 1                     | 1161 | 598 (51.5)                      | 0.99 (0.88, 1.10) | 0.91 (0.80, 1.03)       | 103 (8.9)                      | 0.98 (0.75, 1.29) | 0.83 (0.62, 1.11)       |
|                                  | 2+                    | 598  | 294 (49.2)                      | 1.08 (0.93, 1.25) | 1.01 (0.85, 1.19)       | 102 (17.1)                     | 1.20 (0.89, 1.62) | 0.92 (0.67, 1.27)       |
| <i>Shigella</i>                  | 0                     | 1715 | 1141 (66.5)                     | 1.                | 1.                      | 386 (22.5)                     | 1.                | 1.                      |
|                                  | 1                     | 1141 | 729 (63.9)                      | 1.76 (1.57, 1.97) | 1.52 (1.26, 1.84)       | 170 (14.9)                     | 1.11 (0.91, 1.35) | 0.88 (0.72, 1.08)       |
|                                  | 2+                    | 729  | 428 (58.7)                      | 1.80 (1.60, 2.02) | 1.44 (1.01, 2.07)       | 138 (18.9)                     | 0.99 (0.79, 1.23) | 0.69 (0.55, 0.87)       |
| ST-EPEC                          | 0                     | 1715 | 1244 (72.5)                     | 1.                | 1.                      | 136 (7.9)                      | 1.                | 1.                      |
|                                  | 1                     | 1244 | 831 (66.8)                      | 1.07 (0.98, 1.18) | 1.04 (0.94, 1.16)       | 143 (11.5)                     | 1.48 (1.16, 1.89) | 1.27 (0.98, 1.65)       |
|                                  | 2+                    | 831  | 518 (62.3)                      | 1.06 (0.95, 1.18) | 1.02 (0.91, 1.14)       | 118 (14.2)                     | 1.10 (0.82, 1.47) | 0.84 (0.62, 1.14)       |
| tEPEC                            | 0                     | 1715 | 1251 (72.9)                     | 1.                | 1.                      | 23 (1.3)                       | 1.                | 1.                      |
|                                  | 1                     | 1251 | 840 (67.1)                      | 1.25 (1.13, 1.39) | 1.20 (0.98, 1.46)       | 6 (0.5)                        | 1.00 (0.35, 2.86) | 0.61 (0.21, 1.79)       |
|                                  | 2+                    | 840  | 465 (55.4)                      | 1.01 (0.90, 1.13) | 0.91 (0.69, 1.19)       | 2 (0.2)                        | 0.47 (0.10, 2.15) | 0.41 (0.08, 2.14)       |
| <i>Campylobacter jejuni/coli</i> | 0                     | 1715 | 1191 (69.4)                     | 1.                | 1.                      | 70 (4.1)                       | 1.                | 1.                      |
|                                  | 1                     | 1191 | 856 (71.9)                      | 1.39 (1.25, 1.55) | 1.40 (1.25, 1.56)       | 38 (3.2)                       | 1.39 (0.88, 2.17) | 1.43 (0.89, 2.31)       |
|                                  | 2+                    | 856  | 578 (67.5)                      | 1.76 (1.58, 1.97) | 1.68 (1.49, 1.90)       | 43 (5.0)                       | 1.48 (0.92, 2.38) | 1.49 (0.92, 2.42)       |
| <i>Cryptosporidium</i>           | 0                     | 1715 | 950 (55.4)                      | 1.                | 1.                      | 84 (4.9)                       | 1.                | 1.                      |
|                                  | 1                     | 950  | 362 (38.1)                      | 0.98 (0.85, 1.14) | 0.89 (0.71, 1.12)       | 19 (2.0)                       | 0.53 (0.32, 0.89) | 0.44 (0.26, 0.74)       |
|                                  | 2+                    | 362  | 126 (34.8)                      | 0.94 (0.77, 1.14) | 0.80 (0.56, 1.16)       | 12 (3.3)                       | 0.46 (0.24, 0.87) | 0.35 (0.18, 0.66)       |

\*Hazard ratio adjusted for site, SES, sex, enrollment WAZ, maternal education, maternal height, crowding, and exclusive breastfeeding in first 6 months

†Hazard ratio adjusted for the same variables above and calibrated based on negative control estimates

**Table S8.** Estimates of protection with minimum duration between new infections at 31 days instead of 21.

| Pathogen                         | # previous infections | N    | Infection outcome               |                   |                         | Attributable diarrhea outcome  |                   |                         |
|----------------------------------|-----------------------|------|---------------------------------|-------------------|-------------------------|--------------------------------|-------------------|-------------------------|
|                                  |                       |      | N (%) with subsequent infection | HR* (95% CI)      | Calibrated† HR (95% CI) | N (%) with subsequent diarrhea | HR* (95% CI)      | Calibrated† HR (95% CI) |
| Rotavirus                        | 0                     | 1715 | 839 (48.9)                      | 1.                | 1.                      | 382 (22.3)                     | 1.                | 1.                      |
|                                  | 1                     | 839  | 248 (29.6)                      | 0.70 (0.60, 0.82) | 0.66 (0.53, 0.81)       | 125 (14.9)                     | 0.59 (0.47, 0.73) | 0.50 (0.40, 0.62)       |
|                                  | 2+                    | 248  | 64 (25.8)                       | 0.79 (0.58, 1.07) | 0.71 (0.52, 0.98)       | 35 (13.9)                      | 0.51 (0.36, 0.72) | 0.39 (0.27, 0.56)       |
| Astrovirus                       | 0                     | 1715 | 1048 (61.1)                     | 1.                | 1.                      | 181 (10.6)                     | 1.                | 1.                      |
|                                  | 1                     | 1048 | 464 (44.3)                      | 0.79 (0.70, 0.89) | 0.75 (0.62, 0.90)       | 86 (8.2)                       | 0.72 (0.55, 0.96) | 0.63 (0.48, 0.84)       |
|                                  | 2+                    | 464  | 152 (32.8)                      | 0.71 (0.60, 0.85) | 0.70 (0.57, 0.86)       | 34 (7.3)                       | 0.61 (0.41, 0.90) | 0.49 (0.33, 0.74)       |
| Norovirus GII                    | 0                     | 1715 | 1310 (76.4)                     | 1.                | 1.                      | 143 (8.3)                      | 1.                | 1.                      |
|                                  | 1                     | 1310 | 771 (58.9)                      | 0.89 (0.81, 0.99) | 0.89 (0.80, 0.99)       | 92 (7.0)                       | 0.74 (0.55, 0.98) | 0.70 (0.50, 0.99)       |
|                                  | 2+                    | 771  | 338 (43.8)                      | 0.77 (0.68, 0.88) | 0.81 (0.71, 0.93)       | 56 (7.3)                       | 0.63 (0.45, 0.90) | 0.62 (0.44, 0.89)       |
| Sapovirus                        | 0                     | 1715 | 1350 (78.7)                     | 1.                | 1.                      | 232 (13.5)                     | 1.                | 1.                      |
|                                  | 1                     | 1350 | 808 (59.9)                      | 0.88 (0.80, 0.97) | 0.87 (0.77, 0.97)       | 164 (12.1)                     | 0.93 (0.75, 1.15) | 0.83 (0.67, 1.03)       |
|                                  | 2+                    | 808  | 358 (44.3)                      | 0.76 (0.67, 0.86) | 0.71 (0.62, 0.81)       | 104 (12.9)                     | 1.03 (0.79, 1.35) | 0.85 (0.64, 1.12)       |
| Adenovirus 40/41                 | 0                     | 1715 | 1161 (67.7)                     | 1.                | 1.                      | 169 (9.9)                      | 1.                | 1.                      |
|                                  | 1                     | 1161 | 570 (49.1)                      | 0.91 (0.81, 1.01) | 0.84 (0.74, 0.95)       | 110 (9.5)                      | 1.00 (0.77, 1.30) | 0.85 (0.64, 1.12)       |
|                                  | 2+                    | 570  | 257 (45.1)                      | 0.94 (0.80, 1.11) | 0.88 (0.74, 1.06)       | 82 (14.4)                      | 0.99 (0.72, 1.38) | 0.76 (0.54, 1.07)       |
| <i>Shigella</i>                  | 0                     | 1715 | 1141 (66.5)                     | 1.                | 1.                      | 396 (23.1)                     | 1.                | 1.                      |
|                                  | 1                     | 1141 | 663 (58.1)                      | 1.38 (1.23, 1.54) | 1.19 (0.98, 1.44)       | 180 (15.8)                     | 1.01 (0.83, 1.22) | 0.80 (0.65, 0.98)       |
|                                  | 2+                    | 663  | 332 (50.1)                      | 1.34 (1.18, 1.52) | 1.08 (0.75, 1.55)       | 104 (15.6)                     | 0.93 (0.73, 1.18) | 0.65 (0.51, 0.84)       |
| ST-EPEC                          | 0                     | 1715 | 1244 (72.5)                     | 1.                | 1.                      | 143 (8.3)                      | 1.                | 1.                      |
|                                  | 1                     | 1244 | 815 (65.5)                      | 1.00 (0.91, 1.10) | 0.97 (0.87, 1.07)       | 147 (11.8)                     | 1.33 (1.05, 1.70) | 1.15 (0.88, 1.49)       |
|                                  | 2+                    | 815  | 495 (60.7)                      | 0.95 (0.85, 1.06) | 0.92 (0.81, 1.03)       | 106 (13.0)                     | 0.92 (0.69, 1.23) | 0.70 (0.52, 0.95)       |
| tEPEC                            | 0                     | 1715 | 1251 (72.9)                     | 1.                | 1.                      | 25 (1.5)                       | 1.                | 1.                      |
|                                  | 1                     | 1251 | 807 (64.5)                      | 1.05 (0.95, 1.17) | 1.01 (0.83, 1.23)       | 4 (0.3)                        | 0.54 (0.18, 1.66) | 0.33 (0.11, 1.04)       |
|                                  | 2+                    | 807  | 390 (48.3)                      | 0.82 (0.73, 0.93) | 0.74 (0.57, 0.98)       | 2 (0.2)                        | 0.57 (0.11, 2.83) | 0.50 (0.09, 2.80)       |
| <i>Campylobacter jejuni/coli</i> | 0                     | 1715 | 1191 (69.4)                     | 1.                | 1.                      | 74 (4.3)                       | 1.                | 1.                      |
|                                  | 1                     | 1191 | 821 (68.9)                      | 1.20 (1.08, 1.33) | 1.20 (1.07, 1.34)       | 41 (3.4)                       | 1.36 (0.86, 2.16) | 1.41 (0.86, 2.30)       |
|                                  | 2+                    | 821  | 515 (62.7)                      | 1.41 (1.25, 1.58) | 1.34 (1.18, 1.52)       | 35 (4.3)                       | 1.45 (0.87, 2.42) | 1.47 (0.87, 2.45)       |
| <i>Cryptosporidium</i>           | 0                     | 1715 | 950 (55.4)                      | 1.                | 1.                      | 87 (5.1)                       | 1.                | 1.                      |
|                                  | 1                     | 950  | 314 (33.1)                      | 0.77 (0.67, 0.89) | 0.70 (0.56, 0.88)       | 18 (1.9)                       | 0.43 (0.26, 0.69) | 0.35 (0.21, 0.58)       |
|                                  | 2+                    | 314  | 80 (25.5)                       | 0.67 (0.52, 0.85) | 0.57 (0.39, 0.84)       | 6 (1.9)                        | 0.29 (0.12, 0.73) | 0.22 (0.09, 0.55)       |

\*Hazard ratio adjusted for site, SES, sex, enrollment WAZ, maternal education, maternal height, crowding, and exclusive breastfeeding in first 6 months

†Hazard ratio adjusted for the same variables above and calibrated based on negative control estimates



**Table S9.** Estimates of protection with prior attributable diarrhea instead of prior infection as the definition of prior exposure resulting in immunity.

| Pathogen                         | # previous diarrhea | N    | Infection outcome               |                   |                         | Attributable diarrhea outcome  |                    |                         |
|----------------------------------|---------------------|------|---------------------------------|-------------------|-------------------------|--------------------------------|--------------------|-------------------------|
|                                  |                     |      | N (%) with subsequent infection | HR* (95% CI)      | Calibrated† HR (95% CI) | N (%) with subsequent diarrhea | HR* (95% CI)       | Calibrated† HR (95% CI) |
| Rotavirus                        | 0                   | 1715 | 839 (48.9)                      | 1.                | 1.                      | 446 (26.0)                     | 1.                 | 1.                      |
|                                  | 1                   | 446  | 148 (33.2)                      | 0.79 (0.66, 0.95) | 0.74 (0.59, 0.93)       | 93 (20.9)                      | 0.72 (0.57, 0.92)  | 0.61 (0.48, 0.78)       |
|                                  | 2+                  | 93   | 21 (22.6)                       | 0.54 (0.33, 0.86) | 0.49 (0.30, 0.78)       | 11 (11.8)                      | 0.42 (0.23, 0.76)  | 0.32 (0.17, 0.59)       |
| Astrovirus                       | 0                   | 1715 | 1048 (61.1)                     | 1.                | 1.                      | 261 (15.2)                     | 1.                 | 1.                      |
|                                  | 1                   | 261  | 120 (46.0)                      | 0.97 (0.82, 1.15) | 0.92 (0.74, 1.15)       | 37 (14.2)                      | 1.05 (0.73, 1.50)  | 0.92 (0.64, 1.32)       |
|                                  | 2+                  | 37   | 15 (40.5)                       | 1.05 (0.66, 1.68) | 1.03 (0.64, 1.67)       | 4 (10.8)                       | 0.93 (0.35, 2.47)  | 0.75 (0.28, 2.01)       |
| Norovirus GII                    | 0                   | 1715 | 1310 (76.4)                     | 1.                | 1.                      | 254 (14.8)                     | 1.                 | 1.                      |
|                                  | 1                   | 254  | 137 (53.9)                      | 1.15 (1.00, 1.33) | 1.14 (0.99, 1.32)       | 36 (14.2)                      | 0.89 (0.63, 1.25)  | 0.85 (0.57, 1.25)       |
|                                  | 2+                  | 36   | 15 (41.7)                       | 1.06 (0.72, 1.54) | 1.11 (0.76, 1.63)       | 2 (5.6)                        | 0.56 (0.14, 2.29)  | 0.55 (0.13, 2.25)       |
| Sapovirus                        | 0                   | 1715 | 1350 (78.7)                     | 1.                | 1.                      | 388 (22.6)                     | 1.                 | 1.                      |
|                                  | 1                   | 388  | 242 (62.4)                      | 1.06 (0.94, 1.20) | 1.05 (0.91, 1.19)       | 112 (28.9)                     | 1.51 (1.22, 1.88)  | 1.35 (1.08, 1.69)       |
|                                  | 2+                  | 112  | 57 (50.9)                       | 1.05 (0.84, 1.32) | 0.99 (0.78, 1.24)       | 24 (21.4)                      | 1.40 (0.95, 2.08)  | 1.15 (0.77, 1.72)       |
| Adenovirus 40/41                 | 0                   | 1715 | 1161 (67.7)                     | 1.                | 1.                      | 247 (14.4)                     | 1.                 | 1.                      |
|                                  | 1                   | 247  | 170 (68.8)                      | 1.09 (0.92, 1.28) | 1.00 (0.84, 1.19)       | 90 (36.4)                      | 1.22 (0.93, 1.60)  | 1.03 (0.77, 1.38)       |
|                                  | 2+                  | 90   | 55 (61.1)                       | 0.98 (0.78, 1.24) | 0.92 (0.72, 1.17)       | 38 (42.2)                      | 1.35 (0.94, 1.95)  | 1.04 (0.72, 1.52)       |
| <i>Shigella</i>                  | 0                   | 1715 | 1141 (66.5)                     | 1.                | 1.                      | 507 (29.6)                     | 1.                 | 1.                      |
|                                  | 1                   | 507  | 324 (63.9)                      | 1.46 (1.29, 1.65) | 1.26 (1.03, 1.53)       | 160 (31.6)                     | 1.18 (0.97, 1.44)  | 0.94 (0.76, 1.15)       |
|                                  | 2+                  | 160  | 86 (53.8)                       | 1.38 (1.13, 1.68) | 1.11 (0.75, 1.65)       | 43 (26.9)                      | 1.16 (0.85, 1.58)  | 0.81 (0.59, 1.12)       |
| ST-EPEC                          | 0                   | 1715 | 1244 (72.5)                     | 1.                | 1.                      | 330 (19.2)                     | 1.                 | 1.                      |
|                                  | 1                   | 330  | 223 (67.6)                      | 1.07 (0.96, 1.19) | 1.04 (0.93, 1.17)       | 82 (24.8)                      | 1.27 (0.97, 1.65)  | 1.09 (0.82, 1.45)       |
|                                  | 2+                  | 82   | 52 (63.4)                       | 1.12 (0.90, 1.38) | 1.07 (0.86, 1.33)       | 21 (25.6)                      | 1.52 (0.94, 2.47)  | 1.16 (0.71, 1.90)       |
| tEPEC                            | 0                   | 1715 | 1251 (72.9)                     | 1.                | 1.                      | 29 (1.7)                       | 1.                 | 1.                      |
|                                  | 1                   | 29   | 18 (62.1)                       | 0.83 (0.60, 1.14) | 0.79 (0.55, 1.14)       | 2 (6.9)                        | 5.58 (1.44, 21.68) | 3.41 (0.86, 13.48)      |
|                                  | 2+                  | 2    | 2 (100.0)                       | 0.71 (0.34, 1.51) | 0.64 (0.29, 1.42)       | 0                              | —                  | —                       |
| <i>Campylobacter jejuni/coli</i> | 0                   | 1715 | 1191 (69.4)                     | 1.                | 1.                      | 124 (7.2)                      | 1.                 | 1.                      |
|                                  | 1                   | 124  | 86 (69.4)                       | 1.17 (0.96, 1.44) | 1.17 (0.95, 1.44)       | 25 (20.2)                      | 1.29 (0.79, 2.11)  | 1.34 (0.80, 2.24)       |
|                                  | 2+                  | 25   | 14 (56.0)                       | 1.01 (0.60, 1.72) | 0.97 (0.57, 1.64)       | 6 (24.0)                       | 1.79 (0.80, 3.99)  | 1.80 (0.80, 4.05)       |
| <i>Cryptosporidium</i>           | 0                   | 1715 | 950 (55.4)                      | 1.                | 1.                      | 102 (5.9)                      | 1.                 | 1.                      |
|                                  | 1                   | 102  | 48 (47.1)                       | 1.28 (1.00, 1.63) | 1.16 (0.86, 1.57)       | 9 (8.8)                        | 1.35 (0.71, 2.59)  | 1.11 (0.57, 2.15)       |
|                                  | 2+                  | 9    | 1 (11.1)                        | 0.60 (0.06, 6.16) | 0.51 (0.05, 5.39)       | 0                              | —                  | —                       |

\*Hazard ratio adjusted for site, SES, sex, enrollment WAZ, maternal education, maternal height, crowding, and exclusive breastfeeding in first 6 months

†Hazard ratio adjusted for the same variables above and calibrated based on negative control estimates

**Table S10.** Estimates of protection excluding diarrhea episodes with multiple attributable pathogens.

| Pathogen                         | # previous infections | Attributable diarrhea outcome |                                |                   | Calibrated <sup>†</sup> HR (95% CI) |
|----------------------------------|-----------------------|-------------------------------|--------------------------------|-------------------|-------------------------------------|
|                                  |                       | N                             | N (%) with subsequent diarrhea | HR* (95% CI)      |                                     |
| Rotavirus                        | 0                     | 1715                          | 298 (17.4)                     | 1.                | 1.                                  |
|                                  | 1                     | 839                           | 87 (10.4)                      | 0.57 (0.44, 0.74) | 0.48 (0.37, 0.63)                   |
|                                  | 2+                    | 271                           | 22 (8.1)                       | 0.39 (0.25, 0.61) | 0.30 (0.19, 0.47)                   |
| Astrovirus                       | 0                     | 1715                          | 134 (7.8)                      | 1.                | 1.                                  |
|                                  | 1                     | 1048                          | 54 (5.2)                       | 0.69 (0.49, 0.97) | 0.60 (0.43, 0.85)                   |
|                                  | 2+                    | 483                           | 29 (6.0)                       | 0.73 (0.47, 1.16) | 0.60 (0.38, 0.95)                   |
| Norovirus GII                    | 0                     | 1715                          | 116 (6.8)                      | 1.                | 1.                                  |
|                                  | 1                     | 1310                          | 59 (4.5)                       | 0.58 (0.41, 0.81) | 0.55 (0.37, 0.81)                   |
|                                  | 2+                    | 799                           | 36 (4.5)                       | 0.41 (0.27, 0.61) | 0.40 (0.26, 0.60)                   |
| Sapovirus                        | 0                     | 1715                          | 159 (9.3)                      | 1.                | 1.                                  |
|                                  | 1                     | 1350                          | 94 (7.0)                       | 0.84 (0.64, 1.10) | 0.75 (0.57, 0.99)                   |
|                                  | 2+                    | 836                           | 80 (9.6)                       | 1.08 (0.79, 1.48) | 0.88 (0.64, 1.22)                   |
| Adenovirus 40/41                 | 0                     | 1715                          | 98 (5.7)                       | 1.                | 1.                                  |
|                                  | 1                     | 1161                          | 60 (5.2)                       | 1.28 (0.90, 1.84) | 1.09 (0.75, 1.58)                   |
|                                  | 2+                    | 591                           | 42 (7.1)                       | 1.17 (0.74, 1.84) | 0.90 (0.57, 1.43)                   |
| <i>Shigella</i>                  | 0                     | 1715                          | 256 (14.9)                     | 1.                | 1.                                  |
|                                  | 1                     | 1141                          | 111 (9.7)                      | 1.14 (0.89, 1.46) | 0.90 (0.70, 1.16)                   |
|                                  | 2+                    | 720                           | 79 (11.0)                      | 0.99 (0.74, 1.32) | 0.69 (0.52, 0.93)                   |
| ST-EPEC                          | 0                     | 1715                          | 82 (4.8)                       | 1.                | 1.                                  |
|                                  | 1                     | 1244                          | 69 (5.5)                       | 1.21 (0.86, 1.69) | 1.04 (0.73, 1.48)                   |
|                                  | 2+                    | 825                           | 62 (7.5)                       | 0.97 (0.65, 1.46) | 0.74 (0.49, 1.13)                   |
| tEPEC                            | 0                     | 1715                          | 16 (0.9)                       | 1.                | 1.                                  |
|                                  | 1                     | 1251                          | 5 (0.4)                        | 1.56 (0.50, 4.86) | 0.95 (0.30, 3.03)                   |
|                                  | 2+                    | 835                           | 1 (0.1)                        | 0.68 (0.09, 5.38) | 0.60 (0.07, 5.20)                   |
| <i>Campylobacter jejuni/coli</i> | 0                     | 1715                          | 46 (2.7)                       | 1.                | 1.                                  |
|                                  | 1                     | 1191                          | 21 (1.8)                       | 1.45 (0.81, 2.59) | 1.50 (0.82, 2.74)                   |
|                                  | 2+                    | 851                           | 23 (2.7)                       | 1.68 (0.86, 3.25) | 1.69 (0.87, 3.29)                   |
| <i>Cryptosporidium</i>           | 0                     | 1715                          | 58 (3.4)                       | 1.                | 1.                                  |
|                                  | 1                     | 950                           | 11 (1.2)                       | 0.39 (0.20, 0.74) | 0.32 (0.16, 0.61)                   |
|                                  | 2+                    | 346                           | 6 (1.7)                        | 0.33 (0.14, 0.76) | 0.25 (0.11, 0.58)                   |

\*Hazard ratio adjusted for site, SES, sex, enrollment WAZ, maternal education, maternal height, crowding, and exclusive breastfeeding in first 6 months

<sup>†</sup>Hazard ratio adjusted for the same variables above and calibrated based on negative control estimates

**Table S11.** Estimates of protection comparing calibration with negative controls of the same pathogen type (primary analysis) and with all pathogens (sensitivity analysis).

| Pathogen                         | # previous infections | Infection outcome |                         |                | Attributable diarrhea outcome        |                |                         |                |                                      |
|----------------------------------|-----------------------|-------------------|-------------------------|----------------|--------------------------------------|----------------|-------------------------|----------------|--------------------------------------|
|                                  |                       | Mean (SD) bias    | Calibrated* HR (95% CI) | Mean (SD) bias | All pathogen calibrated† HR (95% CI) | Mean (SD) bias | Calibrated* HR (95% CI) | Mean (SD) bias | All pathogen calibrated† HR (95% CI) |
| Rotavirus                        | 0                     |                   | 1.                      |                | 1.                                   |                | 1.                      |                | 1                                    |
|                                  | 1                     | 0.06 (0.07)       | 0.74 (0.61, 0.91)       | 0.00 (0.05)    | 0.79 (0.66, 0.95)                    | 0.17 (0.02)    | 0.53 (0.42, 0.66)       | 0.05 (0.06)    | 0.59 (0.46, 0.77)                    |
|                                  | 2+                    | 0.10 (0.03)       | 0.73 (0.55, 0.97)       | -0.01 (0.06)   | 0.81 (0.60, 1.10)                    | 0.26 (0.05)    | 0.43 (0.31, 0.61)       | 0.14 (0.42)    | 0.49 (0.20, 1.18)                    |
| Astrovirus                       | 0                     |                   | 1.                      |                | 1.                                   |                | 1.                      |                | 1                                    |
|                                  | 1                     | 0.05 (0.07)       | 0.78 (0.65, 0.94)       | -0.01 (0.06)   | 0.83 (0.70, 0.98)                    | 0.13 (0.04)    | 0.66 (0.49, 0.87)       | 0.04 (0.05)    | 0.72 (0.54, 0.96)                    |
|                                  | 2+                    | 0.02 (0.05)       | 0.72 (0.60, 0.88)       | -0.05 (0.08)   | 0.78 (0.62, 0.97)                    | 0.21 (0.04)    | 0.52 (0.35, 0.77)       | 0.11 (0.07)    | 0.57 (0.38, 0.86)                    |
| Norovirus GII                    | 0                     |                   | 1.                      |                | 1.                                   |                | 1.                      |                | 1                                    |
|                                  | 1                     | 0.01 (0.02)       | 0.96 (0.86, 1.07)       | -0.04 (0.03)   | 1.01 (0.90, 1.13)                    | 0.05 (0.10)    | 0.73 (0.52, 1.03)       | -0.05 (0.06)   | 0.81 (0.59, 1.10)                    |
|                                  | 2+                    | -0.05 (0.02)      | 0.88 (0.78, 1.01)       | -0.13 (0.08)   | 0.96 (0.79, 1.17)                    | 0.02 (0.04)    | 0.56 (0.40, 0.79)       | -0.08 (0.03)   | 0.62 (0.44, 0.87)                    |
| Sapovirus                        | 0                     |                   | 1.                      |                | 1.                                   |                | 1.                      |                | 1                                    |
|                                  | 1                     | 0.02 (0.03)       | 0.92 (0.82, 1.03)       | -0.01 (0.03)   | 0.94 (0.84, 1.06)                    | 0.11 (0.02)    | 0.82 (0.66, 1.02)       | 0.03 (0.03)    | 0.89 (0.72, 1.11)                    |
|                                  | 2+                    | 0.07 (0.02)       | 0.78 (0.69, 0.88)       | -0.03 (0.05)   | 0.86 (0.73, 1.00)                    | 0.20 (0.03)    | 0.84 (0.65, 1.09)       | 0.08 (0.04)    | 0.95 (0.73, 1.23)                    |
| Adenovirus 40/41                 | 0                     |                   | 1.                      |                | 1.                                   |                | 1.                      |                | 1                                    |
|                                  | 1                     | 0.08 (0.03)       | 0.89 (0.78, 1.01)       | 0.02 (0.03)    | 0.94 (0.83, 1.06)                    | 0.17 (0.05)    | 0.87 (0.65, 1.16)       | 0.13 (0.03)    | 0.90 (0.69, 1.19)                    |
|                                  | 2+                    | 0.07 (0.03)       | 0.95 (0.81, 1.13)       | -0.04 (0.09)   | 1.06 (0.84, 1.34)                    | 0.26 (0.05)    | 0.82 (0.59, 1.14)       | 0.14 (0.12)    | 0.93 (0.63, 1.37)                    |
| <i>Shigella</i>                  | 0                     |                   | 1.                      |                | 1.                                   |                | 1.                      |                | 1                                    |
|                                  | 1                     | 0.15 (0.08)       | 1.46 (1.21, 1.77)       | 0.12 (0.08)    | 1.50 (1.24, 1.81)                    | 0.23 (0.02)    | 0.85 (0.69, 1.04)       | 0.18 (0.02)    | 0.89 (0.73, 1.09)                    |
|                                  | 2+                    | 0.22 (0.17)       | 1.37 (0.95, 1.96)       | 0.14 (0.16)    | 1.48 (1.06, 2.06)                    | 0.35 (0.03)    | 0.67 (0.53, 0.84)       | 0.23 (0.03)    | 0.76 (0.60, 0.95)                    |
| ST-EPEC                          | 0                     |                   | 1.                      |                | 1.                                   |                | 1.                      |                | 1                                    |
|                                  | 1                     | 0.03 (0.02)       | 1.02 (0.92, 1.13)       | 0.02 (0.01)    | 1.03 (0.93, 1.14)                    | 0.15 (0.05)    | 1.25 (0.96, 1.63)       | 0.19 (0.10)    | 1.20 (0.88, 1.65)                    |
|                                  | 2+                    | 0.04 (0.02)       | 1.00 (0.90, 1.13)       | 0.02 (0.01)    | 1.02 (0.91, 1.14)                    | 0.27 (0.05)    | 0.84 (0.62, 1.13)       | 0.23 (0.06)    | 0.87 (0.64, 1.18)                    |
| tEPEC                            | 0                     |                   | 1.                      |                | 1.                                   |                | 1.                      |                | 1                                    |
|                                  | 1                     | 0.05 (0.09)       | 1.15 (0.94, 1.40)       | 0.04 (0.08)    | 1.16 (0.95, 1.40)                    | 0.49 (0.12)    | 0.60 (0.21, 1.75)       | 0.36 (0.06)    | 0.69 (0.24, 1.96)                    |
|                                  | 2+                    | 0.10 (0.13)       | 0.86 (0.66, 1.13)       | 0.05 (0.08)    | 0.91 (0.75, 1.11)                    | 0.12 (0.31)    | 0.46 (0.09, 2.48)       | 0.13 (0.12)    | 0.46 (0.10, 2.24)                    |
| <i>Campylobacter jejuni/coli</i> | 0                     |                   | 1.                      |                | 1.                                   |                | 1.                      |                | 1                                    |
|                                  | 1                     | 0.00 (0.02)       | 1.35 (1.20, 1.51)       | -0.01 (0.02)   | 1.35 (1.21, 1.51)                    | -0.03 (0.09)   | 1.34 (0.82, 2.16)       | 0.01 (0.04)    | 1.28 (0.81, 2.03)                    |
|                                  | 2+                    | 0.05 (0.02)       | 1.63 (1.45, 1.84)       | 0.05 (0.02)    | 1.62 (1.44, 1.83)                    | -0.01 (0.04)   | 1.43 (0.88, 2.34)       | 0.05 (0.03)    | 1.35 (0.83, 2.19)                    |
| <i>Cryptosporidium</i>           | 0                     |                   | 1.                      |                | 1.                                   |                | 1.                      |                | 1                                    |
|                                  | 1                     | 0.10 (0.09)       | 0.81 (0.65, 1.02)       | 0.10 (0.05)    | 0.81 (0.68, 0.97)                    | 0.20 (0.06)    | 0.35 (0.21, 0.59)       | 0.15 (0.05)    | 0.36 (0.22, 0.61)                    |
|                                  | 2+                    | 0.15 (0.15)       | 0.71 (0.49, 1.03)       | 0.16 (0.11)    | 0.71 (0.53, 0.95)                    | 0.28 (0.05)    | 0.25 (0.11, 0.53)       | 0.28 (0.06)    | 0.25 (0.11, 0.54)                    |

\*Hazard ratio adjusted for site, SES, sex, enrollment WAZ, maternal education, maternal height, crowding, and exclusive breastfeeding in first 6 months and calibrated based on negative controls of the same pathogen type (bacteria, viruses, and parasites).

†Hazard ratio adjusted for the same variables and calibrated based on negative controls of all pathogens.

**Table S12.** Estimates of protection comparing adjustment for pre-specified confounders (primary analysis), adjustment for pre-specified confounders and prior exposure to other pathogens (sensitivity analysis), and calibration with negative controls (primary analysis).

| Pathogen                         | # previous infections | N    | Infection outcome               |                                        |                                      | Attributable diarrhea outcome |                                |                                        |                                      |                         |
|----------------------------------|-----------------------|------|---------------------------------|----------------------------------------|--------------------------------------|-------------------------------|--------------------------------|----------------------------------------|--------------------------------------|-------------------------|
|                                  |                       |      | N (%) with subsequent infection | Primary analysis adjusted* HR (95% CI) | Other pathogen adjusted† HR (95% CI) | Calibrated‡ HR (95% CI)       | N (%) with subsequent diarrhea | Primary analysis adjusted* HR (95% CI) | Other pathogen adjusted† HR (95% CI) | Calibrated‡ HR (95% CI) |
| Rotavirus                        | 0                     | 1715 | 839 (48.9)                      | 1.                                     | 1.                                   | 1.                            | 375 (21.9)                     | 1.                                     | 1.                                   | 1.                      |
|                                  | 1                     | 839  | 271 (32.3)                      | 0.79 (0.68, 0.93)                      | 0.77 (0.66, 0.90)                    | 0.74 (0.61, 0.91)             | 127 (15.1)                     | 0.63 (0.50, 0.78)                      | 0.59 (0.47, 0.73)                    | 0.53 (0.42, 0.66)       |
|                                  | 2+                    | 271  | 75 (27.7)                       | 0.81 (0.61, 1.07)                      | 0.76 (0.57, 1.01)                    | 0.73 (0.55, 0.97)             | 42 (15.5)                      | 0.56 (0.40, 0.78)                      | 0.49 (0.36, 0.68)                    | 0.43 (0.31, 0.61)       |
| Astrovirus                       | 0                     | 1715 | 1048 (61.1)                     | 1.                                     | 1.                                   | 1.                            | 177 (10.3)                     | 1.                                     | 1.                                   | 1.                      |
|                                  | 1                     | 1048 | 482 (46.0)                      | 0.82 (0.73, 0.92)                      | 0.81 (0.72, 0.91)                    | 0.78 (0.65, 0.94)             | 85 (8.1)                       | 0.75 (0.57, 0.98)                      | 0.71 (0.54, 0.93)                    | 0.66 (0.49, 0.87)       |
|                                  | 2+                    | 482  | 173 (35.9)                      | 0.74 (0.62, 0.87)                      | 0.72 (0.61, 0.86)                    | 0.72 (0.60, 0.88)             | 39 (8.1)                       | 0.64 (0.43, 0.94)                      | 0.59 (0.39, 0.88)                    | 0.52 (0.35, 0.77)       |
| Norovirus GII                    | 0                     | 1715 | 1310 (76.4)                     | 1.                                     | 1.                                   | 1.                            | 140 (8.2)                      | 1.                                     | 1.                                   | 1.                      |
|                                  | 1                     | 1310 | 799 (61.0)                      | 0.96 (0.87, 1.07)                      | 0.96 (0.87, 1.07)                    | 0.96 (0.86, 1.07)             | 91 (6.9)                       | 0.77 (0.57, 1.02)                      | 0.76 (0.57, 1.02)                    | 0.73 (0.52, 1.03)       |
|                                  | 2+                    | 799  | 386 (48.3)                      | 0.84 (0.74, 0.95)                      | 0.84 (0.74, 0.95)                    | 0.88 (0.78, 1.01)             | 60 (7.5)                       | 0.57 (0.41, 0.80)                      | 0.57 (0.40, 0.80)                    | 0.56 (0.40, 0.79)       |
| Sapovirus                        | 0                     | 1715 | 1350 (78.7)                     | 1.                                     | 1.                                   | 1.                            | 229 (13.4)                     | 1.                                     | 1.                                   | 1.                      |
|                                  | 1                     | 1350 | 833 (61.7)                      | 0.93 (0.85, 1.03)                      | 0.93 (0.84, 1.02)                    | 0.92 (0.82, 1.03)             | 158 (11.7)                     | 0.92 (0.75, 1.14)                      | 0.90 (0.72, 1.11)                    | 0.82 (0.66, 1.02)       |
|                                  | 2+                    | 833  | 405 (48.6)                      | 0.83 (0.74, 0.94)                      | 0.81 (0.72, 0.91)                    | 0.78 (0.69, 0.88)             | 120 (14.4)                     | 1.03 (0.80, 1.32)                      | 0.98 (0.76, 1.26)                    | 0.84 (0.65, 1.09)       |
| Adenovirus 40/41                 | 0                     | 1715 | 1161 (67.7)                     | 1.                                     | 1.                                   | 1.                            | 166 (9.7)                      | 1.                                     | 1.                                   | 1.                      |
|                                  | 1                     | 1161 | 591 (50.9)                      | 0.96 (0.86, 1.07)                      | 0.95 (0.85, 1.07)                    | 0.89 (0.78, 1.01)             | 109 (9.4)                      | 1.03 (0.78, 1.34)                      | 1.00 (0.76, 1.31)                    | 0.87 (0.65, 1.16)       |
|                                  | 2+                    | 591  | 286 (48.4)                      | 1.02 (0.87, 1.19)                      | 0.98 (0.84, 1.15)                    | 0.95 (0.81, 1.13)             | 92 (15.6)                      | 1.07 (0.78, 1.46)                      | 0.99 (0.72, 1.37)                    | 0.82 (0.59, 1.14)       |
| <i>Shigella</i>                  | 0                     | 1715 | 1141 (66.5)                     | 1.                                     | 1.                                   | 1.                            | 391 (22.8)                     | 1.                                     | 1.                                   | 1.                      |
|                                  | 1                     | 1141 | 719 (63.0)                      | 1.69 (1.51, 1.90)                      | 1.60 (1.43, 1.80)                    | 1.46 (1.21, 1.77)             | 171 (15.0)                     | 1.07 (0.87, 1.30)                      | 0.98 (0.80, 1.21)                    | 0.85 (0.69, 1.04)       |
|                                  | 2+                    | 719  | 405 (56.3)                      | 1.70 (1.52, 1.91)                      | 1.55 (1.37, 1.75)                    | 1.37 (0.95, 1.96)             | 126 (17.5)                     | 0.95 (0.76, 1.19)                      | 0.82 (0.65, 1.04)                    | 0.67 (0.53, 0.84)       |
| ST-EPEC                          | 0                     | 1715 | 1244 (72.5)                     | 1.                                     | 1.                                   | 1.                            | 137 (8.0)                      | 1.                                     | 1.                                   | 1.                      |
|                                  | 1                     | 1244 | 825 (66.3)                      | 1.05 (0.95, 1.16)                      | 1.03 (0.94, 1.14)                    | 1.02 (0.92, 1.13)             | 144 (11.6)                     | 1.45 (1.13, 1.85)                      | 1.36 (1.06, 1.74)                    | 1.25 (0.96, 1.63)       |
|                                  | 2+                    | 825  | 513 (62.2)                      | 1.04 (0.94, 1.16)                      | 1.02 (0.92, 1.14)                    | 1.00 (0.90, 1.13)             | 116 (14.1)                     | 1.10 (0.82, 1.46)                      | 1.02 (0.75, 1.37)                    | 0.84 (0.62, 1.13)       |
| tEPEC                            | 0                     | 1715 | 1251 (72.9)                     | 1.                                     | 1.                                   | 1.                            | 23 (1.3)                       | 1.                                     | 1.                                   | 1.                      |
|                                  | 1                     | 1251 | 835 (66.7)                      | 1.21 (1.08, 1.34)                      | 1.19 (1.07, 1.32)                    | 1.15 (0.94, 1.40)             | 6 (0.5)                        | 0.99 (0.35, 2.80)                      | 0.84 (0.32, 2.18)                    | 0.60 (0.21, 1.75)       |
|                                  | 2+                    | 835  | 452 (54.1)                      | 0.96 (0.85, 1.07)                      | 0.94 (0.84, 1.06)                    | 0.86 (0.66, 1.13)             | 2 (0.2)                        | 0.52 (0.11, 2.50)                      | 0.36 (0.06, 1.99)                    | 0.46 (0.09, 2.48)       |
| <i>Campylobacter jejuni/coli</i> | 0                     | 1715 | 1191 (69.4)                     | 1.                                     | 1.                                   | 1.                            | 73 (4.3)                       | 1.                                     | 1.                                   | 1.                      |
|                                  | 1                     | 1191 | 850 (71.4)                      | 1.35 (1.21, 1.50)                      | 1.37 (1.23, 1.53)                    | 1.35 (1.20, 1.51)             | 37 (3.1)                       | 1.29 (0.82, 2.03)                      | 1.32 (0.84, 2.08)                    | 1.34 (0.82, 2.16)       |
|                                  | 2+                    | 850  | 569 (66.9)                      | 1.71 (1.53, 1.91)                      | 1.73 (1.54, 1.93)                    | 1.63 (1.45, 1.84)             | 40 (4.7)                       | 1.42 (0.87, 2.30)                      | 1.55 (0.96, 2.50)                    | 1.43 (0.88, 2.34)       |
| <i>Cryptosporidium</i>           | 0                     | 1715 | 950 (55.4)                      | 1.                                     | 1.                                   | 1.                            | 86 (5.0)                       | 1.                                     | 1.                                   | 1.                      |
|                                  | 1                     | 950  | 347 (36.5)                      | 0.90 (0.78, 1.04)                      | 0.86 (0.74, 1.00)                    | 0.81 (0.65, 1.02)             | 17 (1.8)                       | 0.42 (0.26, 0.70)                      | 0.38 (0.22, 0.64)                    | 0.35 (0.21, 0.59)       |
|                                  | 2+                    | 347  | 111 (32.0)                      | 0.83 (0.68, 1.02)                      | 0.79 (0.64, 0.97)                    | 0.71 (0.49, 1.03)             | 8 (2.3)                        | 0.32 (0.15, 0.70)                      | 0.25 (0.12, 0.55)                    | 0.25 (0.11, 0.53)       |

\*Hazard ratio adjusted for site, SES, sex, enrollment WAZ, maternal education, maternal height, crowding, and exclusive breastfeeding in first 6 months; also shown in Figure 1A

†Hazard ratio adjusted for the same variables above and 1 and 2+ prior exposure to each other pathogen of the same type (bacteria, viruses, or parasites)

‡Hazard ratio adjusted for the same variables in \* and calibrated based on negative control estimates; also shown in Figure 1B

## References

1. Liu J, Gratz J, Amour C, et al. Optimization of Quantitative PCR Methods for Enteropathogen Detection. *PLoS ONE*. 2016;**11**(6):e0158199.
2. Liu J, Platts-Mills JA, Juma J, et al. Use of quantitative molecular diagnostic methods to identify causes of diarrhoea in children: a reanalysis of the GEMS case-control study. *Lancet*. 2016 Sep 24;**388**(10051):1291–1301.
3. Liu J, Gratz J, Amour C, et al. A Laboratory-Developed TaqMan Array Card for Simultaneous Detection of 19 Enteropathogens. *J Clin Microbiol*. 2013 Feb 1;**51**(2):472–480.
4. Liu J, Almeida M, Kabir F, et al. Direct Detection of Shigella in Stool Specimens by Use of a Metagenomic Approach. *J Clin Microbiol*. 2018 Feb;**56**(2).
5. Kelly PJ, Lim LL. Survival analysis for recurrent event data: an application to childhood infectious diseases. *Stat Med*. 2000 Jan 15;**19**(1):13–33.
